# Supplementary material for: Genome-wide circulating microRNA expression profiling indicates biomarkers for epilepsy
Source: PubMed Central journal article supplement (PMC4379481; doi:10.1038/srep09522), 2015-03-31
Supplement: srep09522-s1.pdf [file srep09522-s1.pdf]

**Genome-wide circulating microRNA expression profiling indicates  
biomarkers for epilepsy**

Jun Wang, Jin-Tai Yu, Lin Tan, Yan Tian, Jing Ma, Chen-Chen Tan, Hui-Fu Wang, Ying Liu,  
Meng-Shan Tan, Teng Jiang, Lan Tan

**Supplementary Table S1. Differentially expressed miRNAs in epilepsy samples compared to normal subjects by Illumina Hiseq2000 sequencing.**

**Supplementary Table S2. Mean Cq value of miRNAs in qRT-PCR in the validation phase.**

**Supplementary Table S3. Target genes of the 6 selected miRNAs.**

**Supplementary Table S4. GO terms significantly over-represented among the deregulated miRNA targets.**

**Supplementary Table S5. KEGG pathway analysis results.**

**Supplementary Table S6. Mean Cq value of mRNAs in RT-PCR.**

Supplementary Table S1. Differentially expressed miRNAs in epilepsy

samples compared to normal subjects by Illumina Hiseq2000 sequencing.

| miR-name          | C-expressed | EP-expressed | fold-change(log2 EP/C) | p-value   | sig-lable |
|-------------------|-------------|--------------|------------------------|-----------|-----------|
| hsa-let-7d-5p     | 26          | 105          | 2.00380659             | 1.54E-12  | **        |
| hsa-miR-106b-5p   | 6           | 83           | 3.78006198             | 1.42E-18  | **        |
| hsa-miR-130a-3p   | 167         | 694          | 2.04509727             | 1.97E-76  | **        |
| hsa-miR-144-5p    | 62          | 14           | -2.15680885            | 1.19E-08  | **        |
| hsa-miR-146a-5p   | 9           | 123          | 3.76264396             | 8.01E-27  | **        |
| hsa-miR-15a-5p    | 80          | 12           | -2.74693901            | 7.73E-14  | **        |
| hsa-miR-181c-5p   | 28          | 5            | -2.49529212            | 3.54E-05  | **        |
| hsa-miR-194-5p    | 34          | 4            | -3.09733392            | 3.01E-07  | **        |
| hsa-miR-889-3p    | 36          | 9            | -2.01001383            | 3.67E-05  | **        |
| novel_mir_96      | 75          | 14           | -2.4314333             | 1.43E-11  | **        |
| hsa-let-7a-3p     | 0           | 10           | 6.70168766             | 0.0010144 | **        |
| hsa-let-7a-5p     | 2873        | 5199         | 0.84568813             | 2.29E-47  | **        |
| hsa-let-7b-5p     | 2216        | 3638         | 0.70519991             | 1.03E-75  | **        |
| hsa-let-7c-5p     | 232         | 392          | 0.74674066             | 2.17E-10  | **        |
| hsa-let-7d-3p     | 13          | 41           | 1.64709665             | 0.0001259 | **        |
| hsa-let-7e-5p     | 34          | 53           | 0.63045579             | 0.045608  |           |
| hsa-let-7f-5p     | 3656        | 12300        | 1.74033264             | 0         | **        |
| hsa-let-7g-3p     | 13          | 24           | 0.87452687             | 0.0764263 |           |
| hsa-let-7g-5p     | 610         | 1427         | 1.21611587             | 5.13E-74  | **        |
| hsa-let-7i-3p     | 19          | 28           | 0.54944242             | 0.2017738 |           |
| hsa-let-7i-5p     | 5634        | 12172        | 1.10134711             | 0         | **        |
| hsa-miR-100-5p    | 9147        | 11197        | 0.28175397             | 7.17E-44  | **        |
| hsa-miR-101-3p    | 951         | 4261         | 2.15368748             | 0         | **        |
| hsa-miR-103a-3p   | 5163        | 11703        | 1.17060928             | 0         | **        |
| hsa-miR-106b-3p   | 3667        | 3607         | -0.03378878            | 0.3179403 |           |
| hsa-miR-107       | 4903        | 11277        | 1.19165905             | 0         | **        |
| hsa-miR-10a-5p    | 99799       | 106309       | 0.08117876             | 2.43E-37  | **        |
| hsa-miR-10b-5p    | 979339      | 1086134      | 0.13933414             | 0         |           |
| hsa-miR-1180-3p   | 12          | 36           | 1.57494894             | 0.0005135 | **        |
| hsa-miR-1224-5p   | 11          | 6            | -0.88461904            | 0.2320523 |           |
| hsa-miR-122-5p    | 2099        | 1318         | -0.68133956            | 3.08E-42  | **        |
| hsa-miR-1246      | 41          | 16           | -1.36750871            | 0.0007845 | **        |
| hsa-miR-1255b-5p  | 18          | 0            | -7.55972123            | 3.57E-06  | **        |
| hsa-miR-125a-3p   | 18          | 10           | -0.85803357            | 0.1312061 |           |
| hsa-miR-125a-5p   | 941         | 654          | -0.53489167            | 2.12E-13  | **        |
| hsa-miR-125b-1-3p | 17          | 0            | -7.47719159            | 7.17E-06  | **        |
| hsa-miR-125b-2-3p | 335         | 243          | -0.47319614            | 9.07E-05  | **        |
| hsa-miR-125b-5p   | 114         | 54           | -1.08799268            | 2.50E-06  | **        |
| hsa-miR-126-3p    | 118         | 231          | 0.95911304             | 1.65E-09  | **        |
| hsa-miR-126-5p    | 326         | 1723         | 2.39199288             | 5.69E-69  | **        |
| hsa-miR-1270      | 22          | 8            | -1.46946122            | 0.0101029 | *         |
| hsa-miR-1271-5p   | 5           | 10           | 0.98991746             | 0.2152331 |           |
| hsa-miR-1273h-3p  | 37          | 23           | -0.69586659            | 0.0679972 |           |
| hsa-miR-1273h-5p  | 13          | 9            | -0.54054913            | 0.3954966 |           |
| hsa-miR-127-3p    | 555         | 333          | -0.74695504            | 3.27E-14  | **        |
| hsa-miR-128-1-5p  | 41          | 25           | -0.72367678            | 0.0465929 |           |
| hsa-miR-128-3p    | 63          | 42           | -0.59495979            | 0.0374858 |           |
| hsa-miR-1285-3p   | 28          | 17           | -0.72992043            | 0.0989077 |           |
| hsa-miR-129-5p    | 28          | 0            | -8.19711839            | 3.37E-09  | **        |

|                   |       |        |             |              |
|-------------------|-------|--------|-------------|--------------|
| hsa-miR-1304-3p   | 25    | 2      | -3.65374508 | 2.79E-06 **  |
| hsa-miR-1304-5p   | 11    | 0      | -6.8492487  | 0.0004684 ** |
| hsa-miR-1307-3p   | 100   | 85     | -0.24445706 | 0.2512986    |
| hsa-miR-1307-5p   | 491   | 176    | -1.49013848 | 5.80E-36 **  |
| hsa-miR-130b-3p   | 83    | 166    | 0.9900071   | 1.58E-07 **  |
| hsa-miR-130b-5p   | 0     | 12     | 6.96474517  | 0.0002554 ** |
| hsa-miR-134-5p    | 65    | 44     | -0.57292143 | 0.0410365    |
| hsa-miR-139-5p    | 41    | 68     | 0.71991846  | 0.0107922    |
| hsa-miR-140-3p    | 563   | 941    | 0.73107184  | 4.37E-22 **  |
| hsa-miR-141-3p    | 0     | 82     | 9.73733186  | 2.75E-25 **  |
| hsa-miR-142-3p    | 0     | 104    | 10.08021795 | 7.09E-32 **  |
| hsa-miR-142-5p    | 3239  | 5683   | 0.80111628  | 8.13E-92 **  |
| hsa-miR-143-3p    | 74698 | 108020 | 0.52216919  | 0 **         |
| hsa-miR-144-3p    | 50    | 121    | 1.26501969  | 5.09E-08 **  |
| hsa-miR-145-3p    | 41    | 51     | 0.30486737  | 0.3155855    |
| hsa-miR-145-5p    | 131   | 286    | 1.11645889  | 2.93E-14 **  |
| hsa-miR-1468-5p   | 43    | 18     | -1.26635447 | 0.001182 **  |
| hsa-miR-146b-3p   | 68    | 41     | -0.73991713 | 0.0087477    |
| hsa-miR-146b-5p   | 3177  | 3544   | 0.14772584  | 2.75E-05 **  |
| hsa-miR-148a-3p   | 6219  | 6938   | 0.14784966  | 4.29E-09 **  |
| hsa-miR-148a-5p   | 299   | 183    | -0.71828962 | 7.49E-08 **  |
| hsa-miR-148b-3p   | 12    | 0      | -6.97475872 | 0.0002334 ** |
| hsa-miR-148b-5p   | 0     | 10     | 6.70168766  | 0.0010144 ** |
| hsa-miR-150-3p    | 70    | 27     | -1.38436347 | 8.65E-06 **  |
| hsa-miR-150-5p    | 12    | 0      | -6.97475872 | 0.0002334 ** |
| hsa-miR-151a-3p   | 12462 | 8829   | -0.50720144 | 5.14E-39 **  |
| hsa-miR-151a-5p   | 13    | 0      | -7.0902183  | 0.0001163 ** |
| hsa-miR-151b      | 30    | 63     | 1.06040515  | 0.0006644 ** |
| hsa-miR-152-3p    | 0     | 169    | 10.78065459 | 2.40E-51 **  |
| hsa-miR-155-5p    | 16    | 0      | -7.38973888 | 1.44E-05 **  |
| hsa-miR-15b-3p    | 16    | 8      | -1.01001396 | 0.1040108    |
| hsa-miR-15b-5p    | 27    | 40     | 0.55702942  | 0.1209505    |
| hsa-miR-16-2-3p   | 188   | 249    | 0.39542429  | 0.0044201    |
| hsa-miR-16-5p     | 666   | 5748   | 3.09947777  | 0 **         |
| hsa-miR-17-3p     | 13    | 29     | 1.14751748  | 0.0146061 *  |
| hsa-miR-17-5p     | 41    | 31     | -0.41335991 | 0.2299386    |
| hsa-miR-181a-2-3p | 728   | 418    | -0.81042348 | 1.09E-20 **  |
| hsa-miR-181a-3p   | 164   | 151    | -0.12912828 | 0.4279003    |
| hsa-miR-181a-5p   | 11893 | 15911  | 0.40992412  | 9.41E-29 **  |
| hsa-miR-181b-5p   | 196   | 289    | 0.55022586  | 3.26E-05 **  |
| hsa-miR-181c-3p   | 79    | 43     | -0.88750523 | 0.0009469 ** |
| hsa-miR-181d-5p   | 10    | 8      | -0.33190764 | 0.636666     |
| hsa-miR-182-5p    | 18252 | 29904  | 0.70229616  | 0            |
| hsa-miR-183-5p    | 33    | 0      | -8.43416952 | 1.03E-10 **  |
| hsa-miR-184       | 9     | 17     | 0.90755319  | 0.1264901    |
| hsa-miR-185-3p    | 951   | 4261   | 2.15368748  | 0 **         |
| hsa-miR-185-5p    | 170   | 156    | -0.13397608 | 0.4027301    |
| hsa-miR-186-5p    | 5879  | 3866   | -0.61471685 | 3.93E-96 **  |
| hsa-miR-18a-3p    | 14    | 0      | -7.19711839 | 5.79E-05 **  |
| hsa-miR-190b      | 16    | 12     | -0.42499371 | 0.446961     |
| hsa-miR-191-5p    | 19726 | 19294  | -0.04193389 | 0.0040954    |
| hsa-miR-192-5p    | 38582 | 37561  | -0.04868018 | 3.24E-06 **  |
| hsa-miR-193a-5p   | 23    | 19     | -0.28562853 | 0.5273692    |
| hsa-miR-193b-3p   | 24    | 27     | 0.15998163  | 0.6962547    |

|                  |       |       |             |              |
|------------------|-------|-------|-------------|--------------|
| hsa-miR-193b-5p  | 43    | 16    | -1.4362121  | 0.0003563 ** |
| hsa-miR-197-3p   | 45    | 0     | -8.88160345 | 2.42E-14 **  |
| hsa-miR-199a-3p  | 239   | 382   | 0.66657419  | 1.41E-08 **  |
| hsa-miR-199a-5p  | 43    | 67    | 0.6298396   | 0.0245221    |
| hsa-miR-199b-3p  | 239   | 382   | 0.66657419  | 1.41E-08 **  |
| hsa-miR-19a-3p   | 292   | 110   | -1.41845748 | 1.42E-20 **  |
| hsa-miR-19b-3p   | 2142  | 2949  | 0.45127956  | 1.46E-28 **  |
| hsa-miR-203a     | 12    | 0     | -6.97475872 | 0.0002334 ** |
| hsa-miR-204-5p   | 37    | 32    | -0.21943796 | 0.5311871    |
| hsa-miR-20a-5p   | 0     | 25    | 8.02364348  | 3.26E-08 **  |
| hsa-miR-20b-3p   | 10    | 4     | -1.3317344  | 0.1153298    |
| hsa-miR-210-3p   | 94    | 109   | 0.2036093   | 0.3169358    |
| hsa-miR-2110     | 0     | 20    | 7.70168766  | 1.03E-06 **  |
| hsa-miR-2115-3p  | 15    | 0     | -7.29664095 | 2.89E-05 **  |
| hsa-miR-21-3p    | 777   | 1101  | 0.49283931  | 2.09E-13 **  |
| hsa-miR-215-5p   | 538   | 791   | 0.54608321  | 8.36E-12 **  |
| hsa-miR-21-5p    | 7422  | 20878 | 1.47854075  | 0 **         |
| hsa-miR-221-3p   | 1191  | 1313  | 0.13070603  | 0.0235288    |
| hsa-miR-221-5p   | 59    | 27    | -1.1377135  | 0.0004653 ** |
| hsa-miR-222-3p   | 138   | 154   | 0.14826795  | 0.3813512    |
| hsa-miR-223-3p   | 316   | 360   | 0.17808448  | 0.1092928    |
| hsa-miR-223-5p   | 118   | 69    | -0.78410607 | 0.0002726 ** |
| hsa-miR-22-3p    | 31806 | 20128 | -0.67008284 | 0 **         |
| hsa-miR-224-5p   | 0     | 13    | 7.08023127  | 0.0001281 ** |
| hsa-miR-2276-3p  | 12    | 0     | -6.97475872 | 0.0002334 ** |
| hsa-miR-23a-3p   | 241   | 412   | 0.76362388  | 3.21E-11 **  |
| hsa-miR-23b-3p   | 66    | 85    | 0.35501002  | 0.1337242    |
| hsa-miR-24-3p    | 1228  | 946   | -0.38638635 | 5.09E-10 **  |
| hsa-miR-2467-5p  | 16    | 0     | -7.38973888 | 1.44E-05 **  |
| hsa-miR-25-3p    | 17846 | 28033 | 0.64153769  | 0 **         |
| hsa-miR-26a-5p   | 1434  | 2669  | 0.88626674  | 3.17E-82 **  |
| hsa-miR-26b-3p   | 17    | 47    | 1.45717746  | 0.0001698 ** |
| hsa-miR-26b-5p   | 104   | 261   | 1.31389869  | 1.57E-16 **  |
| hsa-miR-27a-3p   | 210   | 534   | 1.33646054  | 4.67E-33 **  |
| hsa-miR-27a-5p   | 15    | 7     | -1.10958585 | 0.089947     |
| hsa-miR-27b-3p   | 2944  | 5069  | 0.77393562  | 7.48E-123 ** |
| hsa-miR-28-3p    | 3816  | 2351  | -0.70877436 | 1.32E-80 **  |
| hsa-miR-28-5p    | 0     | 22    | 7.83920379  | 2.58E-07 **  |
| hsa-miR-29a-3p   | 49    | 102   | 1.04772792  | 1.71E-05 **  |
| hsa-miR-301a-3p  | 0     | 19    | 7.62767979  | 2.04E-06 **  |
| hsa-miR-30a-3p   | 255   | 216   | -0.24945083 | 0.0613413    |
| hsa-miR-30a-5p   | 2384  | 4081  | 0.76555081  | 1.83E-97 **  |
| hsa-miR-30b-5p   | 14    | 26    | 0.88311289  | 0.0626422    |
| hsa-miR-30c-1-3p | 14    | 7     | -1.01006329 | 0.129629     |
| hsa-miR-30c-2-3p | 52    | 23    | -1.18685223 | 0.0006858 ** |
| hsa-miR-30c-5p   | 21    | 74    | 1.80713955  | 3.27E-08 **  |
| hsa-miR-30d-3p   | 0     | 25    | 8.02364348  | 3.26E-08 **  |
| hsa-miR-30d-5p   | 1979  | 2577  | 0.37093366  | 5.73E-18 **  |
| hsa-miR-30e-3p   | 988   | 769   | -0.37151509 | 7.67E-08 **  |
| hsa-miR-30e-5p   | 648   | 364   | -0.8456173  | 6.78E-20 **  |
| hsa-miR-3130-3p  | 30    | 0     | -8.29664093 | 8.36E-10 **  |
| hsa-miR-3131     | 0     | 11    | 6.83920379  | 0.000509 **  |
| hsa-miR-3146     | 10    | 0     | -6.71163257 | 0.00094 **   |
| hsa-miR-3150b-3p | 26    | 19    | -0.46253851 | 0.2910944    |

|                 |       |       |              |              |
|-----------------|-------|-------|--------------|--------------|
| hsa-miR-3158-3p | 15    | 10    | -0.59495328  | 0.3182481    |
| hsa-miR-3177-3p | 13    | 6     | -1.12558863  | 0.1117789    |
| hsa-miR-3199    | 14    | 0     | -7.19711839  | 5.79E-05 **  |
| hsa-miR-3200-3p | 8     | 20    | 1.31194879   | 0.0253062 *  |
| hsa-miR-3200-5p | 11    | 7     | -0.66219361  | 0.3513546    |
| hsa-miR-320a    | 5556  | 3581  | -0.64367192  | 1.44E-98 **  |
| hsa-miR-320b    | 1220  | 711   | -0.78894746  | 3.92E-32 **  |
| hsa-miR-320c    | 184   | 0     | -10.91332332 | 2.15E-56 **  |
| hsa-miR-320d    | 28    | 20    | -0.49543072  | 0.2429244    |
| hsa-miR-323b-3p | 0     | 12    | 6.96474517   | 0.0002554 ** |
| hsa-miR-324-3p  | 14    | 0     | -7.19711839  | 5.79E-05 **  |
| hsa-miR-324-5p  | 17    | 13    | -0.39696033  | 0.4612445    |
| hsa-miR-32-5p   | 0     | 12    | 6.96474517   | 0.0002554 ** |
| hsa-miR-331-3p  | 16    | 8     | -1.01001396  | 0.1040108    |
| hsa-miR-335-5p  | 18    | 38    | 1.06799503   | 0.0081101 ** |
| hsa-miR-338-3p  | 10    | 0     | -6.71163257  | 0.00094 **   |
| hsa-miR-338-5p  | 12    | 0     | -6.97475872  | 0.0002334 ** |
| hsa-miR-339-3p  | 42    | 22    | -0.94287709  | 0.0115558    |
| hsa-miR-339-5p  | 50    | 104   | 1.04660223   | 1.44E-05 **  |
| hsa-miR-33b-5p  | 5     | 14    | 1.47538389   | 0.042949 *   |
| hsa-miR-340-5p  | 136   | 73    | -0.90761315  | 9.46E-06 **  |
| hsa-miR-342-3p  | 280   | 593   | 1.07261611   | 2.86E-26 **  |
| hsa-miR-342-5p  | 38    | 14    | -1.45052136  | 0.0007332 ** |
| hsa-miR-345-5p  | 154   | 162   | 0.0630784    | 0.6983452    |
| hsa-miR-3605-3p | 30    | 0     | -8.29664093  | 8.36E-10 **  |
| hsa-miR-3605-5p | 8     | 11    | 0.44946491   | 0.5134765    |
| hsa-miR-361-3p  | 42    | 36    | -0.23237321  | 0.480498     |
| hsa-miR-3614-5p | 35    | 0     | -8.51904646  | 2.57E-11 **  |
| hsa-miR-3615    | 47    | 64    | 0.43540755   | 0.1160436    |
| hsa-miR-361-5p  | 44    | 32    | -0.46941791  | 0.1617484    |
| hsa-miR-363-3p  | 474   | 635   | 0.41188409   | 2.30E-06 **  |
| hsa-miR-3648    | 17    | 0     | -7.47719159  | 7.17E-06 **  |
| hsa-miR-3675-5p | 0     | 11    | 6.83920379   | 0.000509 **  |
| hsa-miR-3688-3p | 0     | 29    | 8.23773579   | 2.07E-09 **  |
| hsa-miR-3691-5p | 14    | 0     | -7.19711839  | 5.79E-05 **  |
| hsa-miR-370-3p  | 8     | 17    | 1.07745907   | 0.0784652    |
| hsa-miR-371b-5p | 0     | 21    | 7.77208359   | 5.15E-07 **  |
| hsa-miR-375     | 2237  | 1559  | -0.53093223  | 2.45E-29 **  |
| hsa-miR-377-5p  | 11    | 12    | 0.11549647   | 0.8522324    |
| hsa-miR-378a-3p | 7422  | 3360  | -1.1533346   | 0 **         |
| hsa-miR-378c    | 304   | 163   | -0.90919025  | 3.10E-11 **  |
| hsa-miR-378d    | 0     | 10    | 6.70168766   | 0.0010144 ** |
| hsa-miR-381-3p  | 0     | 13    | 7.08023127   | 0.0001281 ** |
| hsa-miR-3928-3p | 10    | 0     | -6.71163257  | 0.00094 **   |
| hsa-miR-409-3p  | 597   | 322   | -0.9006597   | 2.47E-20 **  |
| hsa-miR-409-5p  | 0     | 10    | 6.70168766   | 0.0010144 ** |
| hsa-miR-410-3p  | 0     | 81    | 9.71962839   | 5.49E-25 **  |
| hsa-miR-411-5p  | 0     | 20    | 7.70168766   | 1.03E-06 **  |
| hsa-miR-412-5p  | 0     | 24    | 7.96474517   | 6.50E-08 **  |
| hsa-miR-421     | 36    | 42    | 0.21240059   | 0.5197028    |
| hsa-miR-423-3p  | 1470  | 1492  | 0.01144348   | 0.8292068    |
| hsa-miR-423-5p  | 10051 | 11826 | 0.22463549   | 1.39E-30 **  |
| hsa-miR-424-3p  | 40    | 29    | -0.4739656   | 0.1786638    |
| hsa-miR-424-5p  | 11    | 0     | -6.8492487   | 0.0004684 ** |

|                  |         |         |              |              |
|------------------|---------|---------|--------------|--------------|
| hsa-miR-425-3p   | 0       | 25      | 8.02364348   | 3.26E-08 **  |
| hsa-miR-425-5p   | 420     | 401     | -0.07677681  | 0.4461005    |
| hsa-miR-432-5p   | 69      | 54      | -0.36363343  | 0.1656402    |
| hsa-miR-4433b-5p | 11      | 4       | -1.46935054  | 0.0745335    |
| hsa-miR-4435     | 12      | 0       | -6.97475872  | 0.0002334 ** |
| hsa-miR-4446-3p  | 10      | 4       | -1.3317344   | 0.1153298    |
| hsa-miR-4467     | 18      | 9       | -1.01005206  | 0.0838265    |
| hsa-miR-4504     | 0       | 12      | 6.96474517   | 0.0002554 ** |
| hsa-miR-450a-5p  | 18      | 0       | -7.55972123  | 3.57E-06 **  |
| hsa-miR-450b-5p  | 0       | 12      | 6.96474517   | 0.0002554 ** |
| hsa-miR-4511     | 0       | 11      | 6.83920379   | 0.000509 **  |
| hsa-miR-451a     | 7422    | 19605   | 1.39135395   | 0 **         |
| hsa-miR-452-5p   | 25      | 0       | -8.03364323  | 2.72E-08 **  |
| hsa-miR-4526     | 10      | 0       | -6.71163257  | 0.00094 **   |
| hsa-miR-454-5p   | 0       | 15      | 7.28669636   | 3.23E-05 **  |
| hsa-miR-455-5p   | 15      | 0       | -7.29664095  | 2.89E-05 **  |
| hsa-miR-4677-3p  | 81      | 85      | 0.05953791   | 0.7913241    |
| hsa-miR-4685-3p  | 184     | 0       | -10.91332332 | 2.15E-56 **  |
| hsa-miR-4732-3p  | 36      | 33      | -0.13551671  | 0.6985725    |
| hsa-miR-4732-5p  | 19      | 26      | 0.4425196    | 0.3131642    |
| hsa-miR-4772-3p  | 12      | 0       | -6.97475872  | 0.0002334 ** |
| hsa-miR-483-5p   | 47      | 64      | 0.43540755   | 0.1160436    |
| hsa-miR-484      | 82      | 102     | 0.30488096   | 0.1544174    |
| hsa-miR-485-5p   | 11      | 0       | -6.8492487   | 0.0004684 ** |
| hsa-miR-486-3p   | 325     | 250     | -0.38849706  | 0.0013182 ** |
| hsa-miR-486-5p   | 3037037 | 3667940 | 0.26231783   | 0 **         |
| hsa-miR-490-5p   | 11      | 0       | -6.8492487   | 0.0004684 ** |
| hsa-miR-493-3p   | 10      | 14      | 0.47552153   | 0.4345422    |
| hsa-miR-493-5p   | 0       | 19      | 7.62767979   | 2.04E-06 **  |
| hsa-miR-495-3p   | 16      | 0       | -7.38973888  | 1.44E-05 **  |
| hsa-miR-500a-3p  | 305     | 365     | 0.249103     | 0.0258874    |
| hsa-miR-501-3p   | 3426    | 2679    | -0.36481801  | 7.45E-23 **  |
| hsa-miR-501-5p   | 11      | 0       | -6.8492487   | 0.0004684 ** |
| hsa-miR-502-3p   | 46      | 34      | -0.44609952  | 0.1720703    |
| hsa-miR-505-3p   | 11      | 13      | 0.23098257   | 0.7029571    |
| hsa-miR-5096     | 18      | 0       | -7.55972123  | 3.57E-06 **  |
| hsa-miR-532-3p   | 0       | 14      | 7.18715409   | 6.43E-05 **  |
| hsa-miR-532-5p   | 1268    | 1919    | 0.58781241   | 5.54E-30 **  |
| hsa-miR-542-3p   | 12      | 0       | -6.97475872  | 0.0002334 ** |
| hsa-miR-548e-3p  | 12      | 0       | -6.97475872  | 0.0002334 ** |
| hsa-miR-548e-5p  | 15      | 9       | -0.75051819  | 0.2204936    |
| hsa-miR-548k     | 0       | 16      | 7.37981154   | 1.62E-05 **  |
| hsa-miR-548o-3p  | 29      | 27      | -0.11305467  | 0.7712175    |
| hsa-miR-551b-5p  | 19      | 0       | -7.63771167  | 1.78E-06 **  |
| hsa-miR-5683     | 0       | 18      | 7.54966917   | 4.07E-06 **  |
| hsa-miR-574-3p   | 23      | 54      | 1.22134902   | 0.0004237 ** |
| hsa-miR-574-5p   | 280     | 596     | 1.07632291   | 1.69E-26 **  |
| hsa-miR-582-3p   | 101     | 87      | -0.22525488  | 0.2864266    |
| hsa-miR-582-5p   | 10      | 0       | -6.71163257  | 0.00094 **   |
| hsa-miR-584-5p   | 104     | 123     | 0.23208366   | 0.2277099    |
| hsa-miR-589-5p   | 90      | 131     | 0.53157547   | 0.0067868    |
| hsa-miR-598-3p   | 0       | 10      | 6.70168766   | 0.0010144 ** |
| hsa-miR-616-5p   | 17      | 0       | -7.47719159  | 7.17E-06 **  |
| hsa-miR-625-3p   | 34      | 9       | -1.93110932  | 9.35E-05 **  |

|                  |       |       |             |              |
|------------------|-------|-------|-------------|--------------|
| hsa-miR-629-5p   | 98    | 41    | -1.26715835 | 8.41E-07 **  |
| hsa-miR-6503-3p  | 11    | 13    | 0.23098257  | 0.7029571    |
| hsa-miR-6511a-3p | 10    | 0     | -6.71163257 | 0.00094 **   |
| hsa-miR-6514-5p  | 10    | 0     | -6.71163257 | 0.00094 **   |
| hsa-miR-652-3p   | 50    | 125   | 1.31194477  | 1.22E-08 **  |
| hsa-miR-654-3p   | 0     | 12    | 6.96474517  | 0.0002554 ** |
| hsa-miR-654-5p   | 0     | 11    | 6.83920379  | 0.000509 **  |
| hsa-miR-660-5p   | 98    | 132   | 0.41969299  | 0.02869      |
| hsa-miR-664a-5p  | 22    | 9     | -1.29951697 | 0.0190449 *  |
| hsa-miR-671-3p   | 13    | 5     | -1.38839204 | 0.0614481    |
| hsa-miR-6740-5p  | 16    | 0     | -7.38973888 | 1.44E-05 **  |
| hsa-miR-675-3p   | 0     | 10    | 6.70168766  | 0.0010144 ** |
| hsa-miR-6779-5p  | 0     | 10    | 6.70168766  | 0.0010144 ** |
| hsa-miR-6837-3p  | 0     | 17    | 7.46719795  | 8.12E-06 **  |
| hsa-miR-6842-3p  | 0     | 12    | 6.96474517  | 0.0002554 ** |
| hsa-miR-6852-5p  | 83    | 31    | -1.43084491 | 6.65E-07 **  |
| hsa-miR-744-5p   | 142   | 112   | -0.35237847 | 0.0529291    |
| hsa-miR-7-5p     | 0     | 12    | 6.96474517  | 0.0002554 ** |
| hsa-miR-760      | 12    | 7     | -0.78770364 | 0.25658      |
| hsa-miR-7641     | 15    | 14    | -0.10948685 | 0.8405606    |
| hsa-miR-766-3p   | 7     | 14    | 0.99003571  | 0.1380743    |
| hsa-miR-769-5p   | 1112  | 551   | -1.02302005 | 1.06E-44 **  |
| hsa-miR-7706     | 141   | 94    | -0.59494435 | 0.0017984    |
| hsa-miR-7849-3p  | 23    | 12    | -0.94856315 | 0.0622761    |
| hsa-miR-7976     | 16    | 0     | -7.38973888 | 1.44E-05 **  |
| hsa-miR-8061     | 12    | 0     | -6.97475872 | 0.0002334 ** |
| hsa-miR-873-3p   | 136   | 73    | -0.90761315 | 9.46E-06 **  |
| hsa-miR-873-5p   | 13    | 15    | 0.19647806  | 0.7251205    |
| hsa-miR-874-3p   | 13    | 9     | -0.54054913 | 0.3954966    |
| hsa-miR-877-5p   | 6     | 14    | 1.21239536  | 0.0810783    |
| hsa-miR-885-5p   | 10    | 0     | -6.71163257 | 0.00094 **   |
| hsa-miR-92a-3p   | 2513  | 7774  | 1.61925887  | 0 **         |
| hsa-miR-92b-3p   | 36    | 33    | -0.13551671 | 0.6985725    |
| hsa-miR-93-5p    | 210   | 534   | 1.33646054  | 4.67E-33 **  |
| hsa-miR-941      | 648   | 318   | -1.03695316 | 2.61E-27 **  |
| hsa-miR-9-5p     | 0     | 65    | 9.40213804  | 3.40E-20 **  |
| hsa-miR-96-5p    | 292   | 110   | -1.41845748 | 1.42E-20 **  |
| hsa-miR-98-5p    | 30    | 111   | 1.87397268  | 3.68E-12 **  |
| hsa-miR-99a-5p   | 1104  | 1187  | 0.09459159  | 0.1168583    |
| hsa-miR-99b-5p   | 19881 | 24755 | 0.30634196  | 9.25E-111 ** |
| novel_mir_1      | 13    | 0     | -7.0902183  | 0.0001163 ** |
| novel_mir_10     | 15    | 0     | -7.29664095 | 2.89E-05 **  |
| novel_mir_100    | 12    | 0     | -6.97475872 | 0.0002334 ** |
| novel_mir_101    | 10    | 0     | -6.71163257 | 0.00094 **   |
| novel_mir_103    | 15    | 0     | -7.29664095 | 2.89E-05 **  |
| novel_mir_104    | 12    | 0     | -6.97475872 | 0.0002334 ** |
| novel_mir_105    | 11    | 0     | -6.8492487  | 0.0004684 ** |
| novel_mir_108    | 14    | 0     | -7.19711839 | 5.79E-05 **  |
| novel_mir_109    | 10    | 0     | -6.71163257 | 0.00094 **   |
| novel_mir_11     | 15    | 0     | -7.29664095 | 2.89E-05 **  |
| novel_mir_110    | 14    | 0     | -7.19711839 | 5.79E-05 **  |
| novel_mir_111    | 10    | 0     | -6.71163257 | 0.00094 **   |
| novel_mir_112    | 17    | 0     | -7.47719159 | 7.17E-06 **  |
| novel_mir_113    | 10    | 8     | -0.33190764 | 0.636666     |



|               |    |    |             |           |    |
|---------------|----|----|-------------|-----------|----|
| novel_mir_115 | 13 | 0  | -7.0902183  | 0.0001163 | ** |
| novel_mir_116 | 13 | 0  | -7.0902183  | 0.0001163 | ** |
| novel_mir_117 | 23 | 0  | -7.91330833 | 1.10E-07  | ** |
| novel_mir_118 | 13 | 0  | -7.0902183  | 0.0001163 | ** |
| novel_mir_12  | 35 | 0  | -8.51904646 | 2.57E-11  | ** |
| novel_mir_120 | 11 | 0  | -6.8492487  | 0.0004684 | ** |
| novel_mir_122 | 12 | 0  | -6.97475872 | 0.0002334 | ** |
| novel_mir_126 | 11 | 0  | -6.8492487  | 0.0004684 | ** |
| novel_mir_127 | 33 | 0  | -8.43416952 | 1.03E-10  | ** |
| novel_mir_128 | 12 | 0  | -6.97475872 | 0.0002334 | ** |
| novel_mir_129 | 12 | 0  | -6.97475872 | 0.0002334 | ** |
| novel_mir_13  | 11 | 0  | -6.8492487  | 0.0004684 | ** |
| novel_mir_130 | 12 | 0  | -6.97475872 | 0.0002334 | ** |
| novel_mir_131 | 21 | 0  | -7.78208087 | 4.42E-07  | ** |
| novel_mir_133 | 13 | 0  | -7.0902183  | 0.0001163 | ** |
| novel_mir_134 | 34 | 0  | -8.4772321  | 5.16E-11  | ** |
| novel_mir_135 | 13 | 0  | -7.0902183  | 0.0001163 | ** |
| novel_mir_136 | 15 | 0  | -7.29664095 | 2.89E-05  | ** |
| novel_mir_137 | 15 | 0  | -7.29664095 | 2.89E-05  | ** |
| novel_mir_138 | 14 | 0  | -7.19711839 | 5.79E-05  | ** |
| novel_mir_139 | 17 | 0  | -7.47719159 | 7.17E-06  | ** |
| novel_mir_14  | 28 | 0  | -8.19711839 | 3.37E-09  | ** |
| novel_mir_140 | 15 | 0  | -7.29664095 | 2.89E-05  | ** |
| novel_mir_141 | 12 | 0  | -6.97475872 | 0.0002334 | ** |
| novel_mir_142 | 11 | 0  | -6.8492487  | 0.0004684 | ** |
| novel_mir_144 | 12 | 0  | -6.97475872 | 0.0002334 | ** |
| novel_mir_145 | 27 | 0  | -8.14465824 | 6.76E-09  | ** |
| novel_mir_146 | 12 | 0  | -6.97475872 | 0.0002334 | ** |
| novel_mir_147 | 10 | 0  | -6.71163257 | 0.00094   | ** |
| novel_mir_149 | 11 | 0  | -6.8492487  | 0.0004684 | ** |
| novel_mir_15  | 20 | 0  | -7.71170138 | 8.87E-07  | ** |
| novel_mir_151 | 15 | 0  | -7.29664095 | 2.89E-05  | ** |
| novel_mir_152 | 10 | 0  | -6.71163257 | 0.00094   | ** |
| novel_mir_153 | 26 | 0  | -8.09021828 | 1.36E-08  | ** |
| novel_mir_155 | 17 | 0  | -7.47719159 | 7.17E-06  | ** |
| novel_mir_156 | 15 | 0  | -7.29664095 | 2.89E-05  | ** |
| novel_mir_157 | 18 | 0  | -7.55972123 | 3.57E-06  | ** |
| novel_mir_158 | 45 | 0  | -8.88160345 | 2.42E-14  | ** |
| novel_mir_159 | 40 | 0  | -8.71170138 | 7.89E-13  | ** |
| novel_mir_160 | 10 | 0  | -6.71163257 | 0.00094   | ** |
| novel_mir_162 | 25 | 0  | -8.03364323 | 2.72E-08  | ** |
| novel_mir_163 | 18 | 0  | -7.55972123 | 3.57E-06  | ** |
| novel_mir_164 | 29 | 27 | -0.11305467 | 0.7712175 |    |
| novel_mir_165 | 15 | 0  | -7.29664095 | 2.89E-05  | ** |
| novel_mir_166 | 11 | 0  | -6.8492487  | 0.0004684 | ** |
| novel_mir_167 | 13 | 0  | -7.0902183  | 0.0001163 | ** |
| novel_mir_168 | 11 | 0  | -6.8492487  | 0.0004684 | ** |
| novel_mir_169 | 18 | 0  | -7.55972123 | 3.57E-06  | ** |
| novel_mir_17  | 11 | 0  | -6.8492487  | 0.0004684 | ** |
| novel_mir_170 | 14 | 0  | -7.19711839 | 5.79E-05  | ** |
| novel_mir_171 | 10 | 0  | -6.71163257 | 0.00094   | ** |
| novel_mir_172 | 10 | 0  | -6.71163257 | 0.00094   | ** |
| novel_mir_173 | 12 | 0  | -6.97475872 | 0.0002334 | ** |
| novel_mir_174 | 41 | 0  | -8.74732027 | 3.93E-13  | ** |

|               |    |    |             |              |
|---------------|----|----|-------------|--------------|
| novel_mir_175 | 12 | 0  | -6.97475872 | 0.0002334 ** |
| novel_mir_176 | 11 | 0  | -6.8492487  | 0.0004684 ** |
| novel_mir_18  | 11 | 0  | -6.8492487  | 0.0004684 ** |
| novel_mir_180 | 13 | 0  | -7.0902183  | 0.0001163 ** |
| novel_mir_181 | 20 | 0  | -7.71170138 | 8.87E-07 **  |
| novel_mir_182 | 26 | 0  | -8.09021828 | 1.36E-08 **  |
| novel_mir_183 | 14 | 0  | -7.19711839 | 5.79E-05 **  |
| novel_mir_184 | 15 | 0  | -7.29664095 | 2.89E-05 **  |
| novel_mir_185 | 16 | 0  | -7.38973888 | 1.44E-05 **  |
| novel_mir_186 | 11 | 0  | -6.8492487  | 0.0004684 ** |
| novel_mir_187 | 20 | 0  | -7.71170138 | 8.87E-07 **  |
| novel_mir_188 | 16 | 0  | -7.38973888 | 1.44E-05 **  |
| novel_mir_19  | 11 | 0  | -6.8492487  | 0.0004684 ** |
| novel_mir_190 | 19 | 0  | -7.63771167 | 1.78E-06 **  |
| novel_mir_191 | 17 | 0  | -7.47719159 | 7.17E-06 **  |
| novel_mir_192 | 18 | 25 | 0.46392225  | 0.3018767    |
| novel_mir_195 | 13 | 0  | -7.0902183  | 0.0001163 ** |
| novel_mir_197 | 13 | 0  | -7.0902183  | 0.0001163 ** |
| novel_mir_198 | 11 | 0  | -6.8492487  | 0.0004684 ** |
| novel_mir_199 | 18 | 0  | -7.55972123 | 3.57E-06 **  |
| novel_mir_2   | 0  | 11 | 6.83920379  | 0.000509 **  |
| novel_mir_20  | 11 | 0  | -6.8492487  | 0.0004684 ** |
| novel_mir_200 | 14 | 0  | -7.19711839 | 5.79E-05 **  |
| novel_mir_201 | 13 | 0  | -7.0902183  | 0.0001163 ** |
| novel_mir_202 | 15 | 0  | -7.29664095 | 2.89E-05 **  |
| novel_mir_206 | 12 | 0  | -6.97475872 | 0.0002334 ** |
| novel_mir_207 | 21 | 0  | -7.78208087 | 4.42E-07 **  |
| novel_mir_208 | 15 | 0  | -7.29664095 | 2.89E-05 **  |
| novel_mir_209 | 10 | 0  | -6.71163257 | 0.00094 **   |
| novel_mir_21  | 12 | 0  | -6.97475872 | 0.0002334 ** |
| novel_mir_210 | 38 | 0  | -8.63767544 | 3.18E-12 **  |
| novel_mir_212 | 15 | 0  | -7.29664095 | 2.89E-05 **  |
| novel_mir_213 | 16 | 0  | -7.38973888 | 1.44E-05 **  |
| novel_mir_214 | 13 | 0  | -7.0902183  | 0.0001163 ** |
| novel_mir_215 | 12 | 0  | -6.97475872 | 0.0002334 ** |
| novel_mir_216 | 17 | 0  | -7.47719159 | 7.17E-06 **  |
| novel_mir_218 | 14 | 0  | -7.19711839 | 5.79E-05 **  |
| novel_mir_219 | 21 | 0  | -7.78208087 | 4.42E-07 **  |
| novel_mir_220 | 12 | 0  | -6.97475872 | 0.0002334 ** |
| novel_mir_221 | 12 | 0  | -6.97475872 | 0.0002334 ** |
| novel_mir_222 | 18 | 0  | -7.55972123 | 3.57E-06 **  |
| novel_mir_223 | 13 | 9  | -0.54054913 | 0.3954966    |
| novel_mir_224 | 17 | 0  | -7.47719159 | 7.17E-06 **  |
| novel_mir_226 | 15 | 0  | -7.29664095 | 2.89E-05 **  |
| novel_mir_227 | 12 | 0  | -6.97475872 | 0.0002334 ** |
| novel_mir_229 | 15 | 0  | -7.29664095 | 2.89E-05 **  |
| novel_mir_23  | 14 | 0  | -7.19711839 | 5.79E-05 **  |
| novel_mir_230 | 16 | 0  | -7.38973888 | 1.44E-05 **  |
| novel_mir_231 | 14 | 0  | -7.19711839 | 5.79E-05 **  |
| novel_mir_232 | 17 | 0  | -7.47719159 | 7.17E-06 **  |
| novel_mir_235 | 11 | 0  | -6.8492487  | 0.0004684 ** |
| novel_mir_236 | 16 | 0  | -7.38973888 | 1.44E-05 **  |
| novel_mir_238 | 38 | 0  | -8.63767544 | 3.18E-12 **  |
| novel_mir_24  | 11 | 0  | -6.8492487  | 0.0004684 ** |

|               |    |    |             |              |
|---------------|----|----|-------------|--------------|
| novel_mir_242 | 12 | 0  | -6.97475872 | 0.0002334 ** |
| novel_mir_243 | 14 | 0  | -7.19711839 | 5.79E-05 **  |
| novel_mir_244 | 13 | 0  | -7.0902183  | 0.0001163 ** |
| novel_mir_245 | 10 | 0  | -6.71163257 | 0.00094 **   |
| novel_mir_246 | 10 | 0  | -6.71163257 | 0.00094 **   |
| novel_mir_247 | 51 | 21 | -1.2900975  | 0.0003321 ** |
| novel_mir_248 | 10 | 0  | -6.71163257 | 0.00094 **   |
| novel_mir_249 | 11 | 0  | -6.8492487  | 0.0004684 ** |
| novel_mir_250 | 28 | 20 | -0.49543072 | 0.2429244    |
| novel_mir_253 | 21 | 0  | -7.78208087 | 4.42E-07 **  |
| novel_mir_255 | 15 | 0  | -7.29664095 | 2.89E-05 **  |
| novel_mir_256 | 13 | 0  | -7.0902183  | 0.0001163 ** |
| novel_mir_258 | 10 | 0  | -6.71163257 | 0.00094 **   |
| novel_mir_259 | 12 | 0  | -6.97475872 | 0.0002334 ** |
| novel_mir_26  | 10 | 0  | -6.71163257 | 0.00094 **   |
| novel_mir_260 | 14 | 0  | -7.19711839 | 5.79E-05 **  |
| novel_mir_261 | 13 | 0  | -7.0902183  | 0.0001163 ** |
| novel_mir_262 | 20 | 0  | -7.71170138 | 8.87E-07 **  |
| novel_mir_263 | 16 | 0  | -7.38973888 | 1.44E-05 **  |
| novel_mir_264 | 15 | 0  | -7.29664095 | 2.89E-05 **  |
| novel_mir_265 | 16 | 0  | -7.38973888 | 1.44E-05 **  |
| novel_mir_266 | 12 | 0  | -6.97475872 | 0.0002334 ** |
| novel_mir_267 | 12 | 0  | -6.97475872 | 0.0002334 ** |
| novel_mir_268 | 15 | 0  | -7.29664095 | 2.89E-05 **  |
| novel_mir_269 | 14 | 0  | -7.19711839 | 5.79E-05 **  |
| novel_mir_270 | 14 | 0  | -7.19711839 | 5.79E-05 **  |
| novel_mir_271 | 10 | 0  | -6.71163257 | 0.00094 **   |
| novel_mir_272 | 13 | 0  | -7.0902183  | 0.0001163 ** |
| novel_mir_273 | 12 | 0  | -6.97475872 | 0.0002334 ** |
| novel_mir_274 | 23 | 0  | -7.91330833 | 1.10E-07 **  |
| novel_mir_275 | 14 | 0  | -7.19711839 | 5.79E-05 **  |
| novel_mir_276 | 12 | 0  | -6.97475872 | 0.0002334 ** |
| novel_mir_277 | 13 | 0  | -7.0902183  | 0.0001163 ** |
| novel_mir_279 | 34 | 0  | -8.4772321  | 5.16E-11 **  |
| novel_mir_280 | 21 | 0  | -7.78208087 | 4.42E-07 **  |
| novel_mir_281 | 18 | 0  | -7.55972123 | 3.57E-06 **  |
| novel_mir_283 | 18 | 0  | -7.55972123 | 3.57E-06 **  |
| novel_mir_284 | 10 | 0  | -6.71163257 | 0.00094 **   |
| novel_mir_285 | 19 | 0  | -7.63771167 | 1.78E-06 **  |
| novel_mir_286 | 14 | 0  | -7.19711839 | 5.79E-05 **  |
| novel_mir_287 | 34 | 0  | -8.4772321  | 5.16E-11 **  |
| novel_mir_288 | 11 | 0  | -6.8492487  | 0.0004684 ** |
| novel_mir_289 | 18 | 0  | -7.55972123 | 3.57E-06 **  |
| novel_mir_29  | 13 | 0  | -7.0902183  | 0.0001163 ** |
| novel_mir_290 | 15 | 0  | -7.29664095 | 2.89E-05 **  |
| novel_mir_291 | 16 | 0  | -7.38973888 | 1.44E-05 **  |
| novel_mir_293 | 10 | 0  | -6.71163257 | 0.00094 **   |
| novel_mir_294 | 15 | 0  | -7.29664095 | 2.89E-05 **  |
| novel_mir_295 | 16 | 0  | -7.38973888 | 1.44E-05 **  |
| novel_mir_296 | 12 | 0  | -6.97475872 | 0.0002334 ** |
| novel_mir_297 | 19 | 0  | -7.63771167 | 1.78E-06 **  |
| novel_mir_298 | 13 | 0  | -7.0902183  | 0.0001163 ** |
| novel_mir_299 | 11 | 0  | -6.8492487  | 0.0004684 ** |
| novel_mir_3   | 15 | 0  | -7.29664095 | 2.89E-05 **  |

|               |     |     |             |              |
|---------------|-----|-----|-------------|--------------|
| novel_mir_30  | 292 | 110 | -1.41845748 | 1.42E-20 **  |
| novel_mir_302 | 13  | 0   | -7.0902183  | 0.0001163 ** |
| novel_mir_303 | 10  | 0   | -6.71163257 | 0.00094 **   |
| novel_mir_307 | 13  | 0   | -7.0902183  | 0.0001163 ** |
| novel_mir_308 | 13  | 0   | -7.0902183  | 0.0001163 ** |
| novel_mir_309 | 13  | 0   | -7.0902183  | 0.0001163 ** |
| novel_mir_310 | 11  | 0   | -6.8492487  | 0.0004684 ** |
| novel_mir_311 | 22  | 0   | -7.84918614 | 2.20E-07 **  |
| novel_mir_312 | 15  | 0   | -7.29664095 | 2.89E-05 **  |
| novel_mir_313 | 18  | 0   | -7.55972123 | 3.57E-06 **  |
| novel_mir_315 | 12  | 0   | -6.97475872 | 0.0002334 ** |
| novel_mir_316 | 19  | 7   | -1.45065658 | 0.01826 *    |
| novel_mir_317 | 10  | 0   | -6.71163257 | 0.00094 **   |
| novel_mir_318 | 33  | 0   | -8.43416952 | 1.03E-10 **  |
| novel_mir_319 | 10  | 0   | -6.71163257 | 0.00094 **   |
| novel_mir_32  | 12  | 0   | -6.97475872 | 0.0002334 ** |
| novel_mir_320 | 11  | 0   | -6.8492487  | 0.0004684 ** |
| novel_mir_321 | 13  | 0   | -7.0902183  | 0.0001163 ** |
| novel_mir_322 | 10  | 0   | -6.71163257 | 0.00094 **   |
| novel_mir_325 | 176 | 208 | 0.23101732  | 0.1179268    |
| novel_mir_326 | 17  | 0   | -7.47719159 | 7.17E-06 **  |
| novel_mir_328 | 11  | 0   | -6.8492487  | 0.0004684 ** |
| novel_mir_329 | 29  | 0   | -8.24773766 | 1.68E-09 **  |
| novel_mir_330 | 15  | 0   | -7.29664095 | 2.89E-05 **  |
| novel_mir_331 | 13  | 0   | -7.0902183  | 0.0001163 ** |
| novel_mir_332 | 26  | 0   | -8.09021828 | 1.36E-08 **  |
| novel_mir_333 | 12  | 0   | -6.97475872 | 0.0002334 ** |
| novel_mir_334 | 10  | 0   | -6.71163257 | 0.00094 **   |
| novel_mir_335 | 18  | 0   | -7.55972123 | 3.57E-06 **  |
| novel_mir_337 | 14  | 0   | -7.19711839 | 5.79E-05 **  |
| novel_mir_338 | 18  | 0   | -7.55972123 | 3.57E-06 **  |
| novel_mir_339 | 17  | 0   | -7.47719159 | 7.17E-06 **  |
| novel_mir_34  | 12  | 0   | -6.97475872 | 0.0002334 ** |
| novel_mir_340 | 15  | 0   | -7.29664095 | 2.89E-05 **  |
| novel_mir_341 | 13  | 0   | -7.0902183  | 0.0001163 ** |
| novel_mir_342 | 14  | 0   | -7.19711839 | 5.79E-05 **  |
| novel_mir_343 | 16  | 0   | -7.38973888 | 1.44E-05 **  |
| novel_mir_344 | 13  | 0   | -7.0902183  | 0.0001163 ** |
| novel_mir_345 | 10  | 0   | -6.71163257 | 0.00094 **   |
| novel_mir_346 | 10  | 0   | -6.71163257 | 0.00094 **   |
| novel_mir_347 | 26  | 0   | -8.09021828 | 1.36E-08 **  |
| novel_mir_348 | 22  | 0   | -7.84918614 | 2.20E-07 **  |
| novel_mir_349 | 22  | 0   | -7.84918614 | 2.20E-07 **  |
| novel_mir_35  | 12  | 0   | -6.97475872 | 0.0002334 ** |
| novel_mir_350 | 11  | 0   | -6.8492487  | 0.0004684 ** |
| novel_mir_351 | 17  | 0   | -7.47719159 | 7.17E-06 **  |
| novel_mir_352 | 12  | 0   | -6.97475872 | 0.0002334 ** |
| novel_mir_353 | 17  | 0   | -7.47719159 | 7.17E-06 **  |
| novel_mir_354 | 10  | 0   | -6.71163257 | 0.00094 **   |
| novel_mir_355 | 10  | 0   | -6.71163257 | 0.00094 **   |
| novel_mir_356 | 18  | 0   | -7.55972123 | 3.57E-06 **  |
| novel_mir_357 | 16  | 0   | -7.38973888 | 1.44E-05 **  |
| novel_mir_359 | 15  | 0   | -7.29664095 | 2.89E-05 **  |
| novel_mir_360 | 10  | 0   | -6.71163257 | 0.00094 **   |

|               |     |     |              |              |
|---------------|-----|-----|--------------|--------------|
| novel_mir_361 | 24  | 0   | -7.97470138  | 5.47E-08 **  |
| novel_mir_362 | 18  | 0   | -7.55972123  | 3.57E-06 **  |
| novel_mir_364 | 11  | 0   | -6.8492487   | 0.0004684 ** |
| novel_mir_365 | 18  | 0   | -7.55972123  | 3.57E-06 **  |
| novel_mir_366 | 14  | 0   | -7.19711839  | 5.79E-05 **  |
| novel_mir_367 | 17  | 0   | -7.47719159  | 7.17E-06 **  |
| novel_mir_368 | 184 | 0   | -10.91332332 | 2.15E-56 **  |
| novel_mir_369 | 18  | 0   | -7.55972123  | 3.57E-06 **  |
| novel_mir_370 | 22  | 0   | -7.84918614  | 2.20E-07 **  |
| novel_mir_371 | 14  | 0   | -7.19711839  | 5.79E-05 **  |
| novel_mir_374 | 0   | 12  | 6.96474517   | 0.0002554 ** |
| novel_mir_376 | 0   | 10  | 6.70168766   | 0.0010144 ** |
| novel_mir_38  | 11  | 0   | -6.8492487   | 0.0004684 ** |
| novel_mir_386 | 0   | 11  | 6.83920379   | 0.000509 **  |
| novel_mir_39  | 13  | 0   | -7.0902183   | 0.0001163 ** |
| novel_mir_391 | 0   | 12  | 6.96474517   | 0.0002554 ** |
| novel_mir_4   | 42  | 0   | -8.78208087  | 1.96E-13 **  |
| novel_mir_40  | 14  | 0   | -7.19711839  | 5.79E-05 **  |
| novel_mir_400 | 0   | 10  | 6.70168766   | 0.0010144 ** |
| novel_mir_403 | 0   | 10  | 6.70168766   | 0.0010144 ** |
| novel_mir_409 | 0   | 12  | 6.96474517   | 0.0002554 ** |
| novel_mir_41  | 10  | 0   | -6.71163257  | 0.00094 **   |
| novel_mir_410 | 0   | 10  | 6.70168766   | 0.0010144 ** |
| novel_mir_411 | 0   | 13  | 7.08023127   | 0.0001281 ** |
| novel_mir_414 | 0   | 15  | 7.28669636   | 3.23E-05 **  |
| novel_mir_418 | 0   | 14  | 7.18715409   | 6.43E-05 **  |
| novel_mir_42  | 35  | 0   | -8.51904646  | 2.57E-11 **  |
| novel_mir_423 | 0   | 29  | 8.23773579   | 2.07E-09 **  |
| novel_mir_429 | 0   | 13  | 7.08023127   | 0.0001281 ** |
| novel_mir_43  | 35  | 0   | -8.51904646  | 2.57E-11 **  |
| novel_mir_431 | 0   | 11  | 6.83920379   | 0.000509 **  |
| novel_mir_432 | 0   | 14  | 7.18715409   | 6.43E-05 **  |
| novel_mir_435 | 0   | 11  | 6.83920379   | 0.000509 **  |
| novel_mir_44  | 251 | 0   | -11.36130792 | 1.15E-76 **  |
| novel_mir_440 | 0   | 11  | 6.83920379   | 0.000509 **  |
| novel_mir_442 | 0   | 13  | 7.08023127   | 0.0001281 ** |
| novel_mir_443 | 0   | 10  | 6.70168766   | 0.0010144 ** |
| novel_mir_449 | 0   | 13  | 7.08023127   | 0.0001281 ** |
| novel_mir_45  | 11  | 0   | -6.8492487   | 0.0004684 ** |
| novel_mir_450 | 0   | 10  | 6.70168766   | 0.0010144 ** |
| novel_mir_451 | 0   | 11  | 6.83920379   | 0.000509 **  |
| novel_mir_452 | 0   | 169 | 10.78065459  | 2.40E-51 **  |
| novel_mir_454 | 0   | 11  | 6.83920379   | 0.000509 **  |
| novel_mir_457 | 0   | 12  | 6.96474517   | 0.0002554 ** |
| novel_mir_459 | 0   | 14  | 7.18715409   | 6.43E-05 **  |
| novel_mir_46  | 14  | 0   | -7.19711839  | 5.79E-05 **  |
| novel_mir_460 | 0   | 43  | 8.80603399   | 1.32E-13 **  |
| novel_mir_461 | 0   | 10  | 6.70168766   | 0.0010144 ** |
| novel_mir_462 | 0   | 11  | 6.83920379   | 0.000509 **  |
| novel_mir_464 | 0   | 10  | 6.70168766   | 0.0010144 ** |
| novel_mir_47  | 17  | 0   | -7.47719159  | 7.17E-06 **  |
| novel_mir_470 | 0   | 12  | 6.96474517   | 0.0002554 ** |
| novel_mir_471 | 0   | 11  | 6.83920379   | 0.000509 **  |
| novel_mir_478 | 0   | 10  | 6.70168766   | 0.0010144 ** |

|               |     |    |             |           |    |
|---------------|-----|----|-------------|-----------|----|
| novel_mir_48  | 12  | 0  | -6.97475872 | 0.0002334 | ** |
| novel_mir_480 | 0   | 10 | 6.70168766  | 0.0010144 | ** |
| novel_mir_484 | 0   | 14 | 7.18715409  | 6.43E-05  | ** |
| novel_mir_487 | 0   | 12 | 6.96474517  | 0.0002554 | ** |
| novel_mir_488 | 0   | 13 | 7.08023127  | 0.0001281 | ** |
| novel_mir_489 | 0   | 20 | 7.70168766  | 1.03E-06  | ** |
| novel_mir_49  | 18  | 0  | -7.55972123 | 3.57E-06  | ** |
| novel_mir_490 | 0   | 10 | 6.70168766  | 0.0010144 | ** |
| novel_mir_495 | 0   | 13 | 7.08023127  | 0.0001281 | ** |
| novel_mir_497 | 0   | 16 | 7.37981154  | 1.62E-05  | ** |
| novel_mir_498 | 0   | 12 | 6.96474517  | 0.0002554 | ** |
| novel_mir_50  | 12  | 0  | -6.97475872 | 0.0002334 | ** |
| novel_mir_501 | 0   | 10 | 6.70168766  | 0.0010144 | ** |
| novel_mir_504 | 0   | 14 | 7.18715409  | 6.43E-05  | ** |
| novel_mir_505 | 0   | 33 | 8.42416629  | 1.31E-10  | ** |
| novel_mir_506 | 0   | 12 | 6.96474517  | 0.0002554 | ** |
| novel_mir_51  | 42  | 0  | -8.78208087 | 1.96E-13  | ** |
| novel_mir_510 | 0   | 10 | 6.70168766  | 0.0010144 | ** |
| novel_mir_518 | 0   | 10 | 6.70168766  | 0.0010144 | ** |
| novel_mir_519 | 0   | 33 | 8.42416629  | 1.31E-10  | ** |
| novel_mir_52  | 17  | 0  | -7.47719159 | 7.17E-06  | ** |
| novel_mir_521 | 0   | 11 | 6.83920379  | 0.000509  | ** |
| novel_mir_53  | 17  | 0  | -7.47719159 | 7.17E-06  | ** |
| novel_mir_530 | 0   | 50 | 9.02364348  | 1.06E-15  | ** |
| novel_mir_533 | 0   | 18 | 7.54966917  | 4.07E-06  | ** |
| novel_mir_55  | 18  | 0  | -7.55972123 | 3.57E-06  | ** |
| novel_mir_56  | 42  | 0  | -8.78208087 | 1.96E-13  | ** |
| novel_mir_58  | 15  | 0  | -7.29664095 | 2.89E-05  | ** |
| novel_mir_59  | 12  | 0  | -6.97475872 | 0.0002334 | ** |
| novel_mir_60  | 15  | 0  | -7.29664095 | 2.89E-05  | ** |
| novel_mir_61  | 14  | 0  | -7.19711839 | 5.79E-05  | ** |
| novel_mir_62  | 10  | 0  | -6.71163257 | 0.00094   | ** |
| novel_mir_64  | 16  | 0  | -7.38973888 | 1.44E-05  | ** |
| novel_mir_65  | 34  | 0  | -8.4772321  | 5.16E-11  | ** |
| novel_mir_66  | 27  | 0  | -8.14465824 | 6.76E-09  | ** |
| novel_mir_67  | 136 | 73 | -0.90761315 | 9.46E-06  |    |
| novel_mir_68  | 15  | 0  | -7.29664095 | 2.89E-05  | ** |
| novel_mir_69  | 15  | 0  | -7.29664095 | 2.89E-05  | ** |
| novel_mir_7   | 20  | 0  | -7.71170138 | 8.87E-07  | ** |
| novel_mir_70  | 27  | 0  | -8.14465824 | 6.76E-09  | ** |
| novel_mir_71  | 11  | 0  | -6.8492487  | 0.0004684 | ** |
| novel_mir_72  | 10  | 0  | -6.71163257 | 0.00094   | ** |
| novel_mir_73  | 15  | 0  | -7.29664095 | 2.89E-05  | ** |
| novel_mir_74  | 11  | 0  | -6.8492487  | 0.0004684 | ** |
| novel_mir_76  | 12  | 0  | -6.97475872 | 0.0002334 | ** |
| novel_mir_77  | 13  | 0  | -7.0902183  | 0.0001163 | ** |
| novel_mir_78  | 12  | 0  | -6.97475872 | 0.0002334 | ** |
| novel_mir_79  | 16  | 0  | -7.38973888 | 1.44E-05  | ** |
| novel_mir_80  | 14  | 0  | -7.19711839 | 5.79E-05  | ** |
| novel_mir_81  | 19  | 0  | -7.63771167 | 1.78E-06  | ** |
| novel_mir_82  | 15  | 0  | -7.29664095 | 2.89E-05  | ** |
| novel_mir_83  | 12  | 0  | -6.97475872 | 0.0002334 | ** |
| novel_mir_84  | 10  | 0  | -6.71163257 | 0.00094   | ** |
| novel_mir_85  | 13  | 0  | -7.0902183  | 0.0001163 | ** |

|              |    |    |             |              |
|--------------|----|----|-------------|--------------|
| novel_mir_86 | 17 | 0  | -7.47719159 | 7.17E-06 **  |
| novel_mir_88 | 10 | 0  | -6.71163257 | 0.00094 **   |
| novel_mir_89 | 12 | 0  | -6.97475872 | 0.0002334 ** |
| novel_mir_9  | 41 | 31 | -0.41335991 | 0.2299386    |
| novel_mir_90 | 11 | 0  | -6.8492487  | 0.0004684 ** |
| novel_mir_91 | 13 | 0  | -7.0902183  | 0.0001163 ** |
| novel_mir_92 | 30 | 0  | -8.29664093 | 8.36E-10 **  |
| novel_mir_93 | 32 | 0  | -8.3897819  | 2.08E-10 **  |
| novel_mir_94 | 18 | 0  | -7.55972123 | 3.57E-06 **  |
| novel_mir_95 | 12 | 0  | -6.97475872 | 0.0002334 ** |
| novel_mir_97 | 10 | 0  | -6.71163257 | 0.00094 **   |
| novel_mir_98 | 28 | 17 | -0.72992043 | 0.0989077    |
| novel_mir_99 | 15 | 0  | -7.29664095 | 2.89E-05 **  |

**Supplementary Table S2. Mean Cq value of miRNAs in qRT-PCR in the validation phase.**

| Sample | cel-miR-39 | let-7d-5p | miR-106b-5p | miR-146a-5p | miR-130a-3p | miR-15a-5p | miR-194-5p |
|--------|------------|-----------|-------------|-------------|-------------|------------|------------|
| C1     | 24.96      | 34.05     | 27.48       | 30.61       | 30.61       | 28.14      | 30.54      |
| C2     | 25.29      | 32.07     | 28.57       | 31.55       | 31.55       | 27.27      | 28.23      |
| C3     | 25.14      | 29.83     | 28.2        | 29.81       | 29.81       | 26.27      | 29.69      |
| C4     | 26.08      | 30.58     | 28.39       | 30.79       | 30.79       | 30.03      | 31.76      |
| C5     | 24.41      | 28.83     | 27.21       | 29.11       | 29.11       | 25.96      | 27.95      |
| C6     | 25.41      | 29.51     | 28.84       | 28.49       | 28.49       | 32.44      | 31.56      |
| C7     | 25.09      | 31.17     | 27.45       | 29.09       | 29.09       | 27.27      | 30.1       |
| C8     | 25.62      | 32.03     | 29.29       | 28.63       | 28.63       | 28.13      | 29.16      |
| C9     | 24.61      | 30.75     | 27          | 30.89       | 30.89       | 28.72      | 29.47      |
| C10    | 24.09      | 29.85     | 26.56       | 27.07       | 27.07       | 27.17      | 28.25      |
| C11    | 25.26      | 29.75     | 27.6        | 32.41       | 32.41       | 29.64      | 28.76      |
| C12    | 24.24      | 33.66     | 28.35       | 30.91       | 30.91       | 26.34      | 28.84      |
| C13    | 24.19      | 32.82     | 27.85       | 31.27       | 31.27       | 26.75      | 28.98      |
| C14    | 24.28      | 32.02     | 27.44       | 28.4        | 28.4        | 26.88      | 27.29      |
| C15    | 25.06      | 28.05     | 28.81       | 30.5        | 30.5        | 27.98      | 29.57      |
| C16    | 24.83      | 30.6      | 28.72       | 31.47       | 31.47       | 27.5       | 27.7       |
| C17    | 24.36      | 27.75     | 27.45       | 31.05       | 31.05       | 25.79      | 29.91      |
| C18    | 25.13      | 28.21     | 29.45       | 31.68       | 31.68       | 26.77      | 31.79      |
| C19    | 24.92      | 30.62     | 29.46       | 30.19       | 30.19       | 28.23      | 29.03      |
| C20    | 24.24      | 29.87     | 28.24       | 29.79       | 29.79       | 26.89      | 28.3       |
| C21    | 24.24      | 28.4      | 29.41       | 31.25       | 31.25       | 25.55      |            |
| C22    | 24.35      | 32        | 27.01       | 29.74       | 29.74       | 25.5       | 29.58      |
| C23    | 24.46      | 33.15     | 28.81       | 28.95       | 28.95       | 26.21      | 28.43      |
| C24    | 25.79      | 29.57     | 27.78       | 30.37       | 30.37       | 29.63      | 30.32      |
| C25    | 24.89      | 33.05     | 27.29       | 30.87       | 30.87       | 29.15      | 30.15      |
| C26    | 24.01      | 28.88     | 27.49       | 31.21       | 31.21       | 25.43      | 28.24      |
| C27    | 25.73      | 33.3      | 29.35       | 32.06       | 32.06       | 27.87      | 28.74      |
| C28    | 25.78      | 33.54     | 28.12       | 31.28       | 31.28       | 27.54      | 30.78      |
| C29    | 25.62      | 33.89     | 28.99       | 31.6        | 31.6        | 28.98      | 30.46      |
| C30    | 25.68      | 33.21     | 30          | 30.38       | 30.38       | 28.07      | 28.88      |
| C31    | 24.49      | 30.12     | 27.99       | 29.6        | 26.74       | 26.5       | 29.75      |
| C32    | 25.45      | 30.25     | 30.14       | 30.88       | 30.89       | 28.8       | 31.38      |
| C33    | 25.1       | 29.74     | 28.56       | 31.17       | 27.34       | 29.25      | 29.66      |
| C34    | 25.12      | 29.15     | 28.8        | 31.26       |             | 27.35      | 30.32      |
| C35    | 25.97      | 30.66     | 29.88       | 32.62       | 29.64       | 29.05      | 30.09      |
| C36    | 25.87      | 30.76     | 30.27       | 29.96       | 29.34       | 29.7       | 30.36      |
| C37    | 25.99      | 33.48     | 29.89       | 32.47       | 29.11       | 29.13      |            |
| C38    | 25.98      | 31.16     | 30.65       | 29.98       | 28.67       | 31.7       | 31.59      |
| C39    | 25.89      | 33.36     | 29.97       | 29.35       | 28.76       | 28.72      | 31.61      |
| C40    | 25.68      | 31.2      | 30.65       | 28.87       | 28.24       | 28.16      | 28.89      |
| C41    | 25.35      | 33.41     | 28.57       | 28.05       | 27.83       | 26.47      | 29.9       |
| C42    | 25.56      | 32.57     | 29.84       | 28.03       | 27.95       | 27.91      | 28.81      |
| C43    | 25.72      | 29.81     | 30.81       | 28.5        | 28.15       | 27.11      | 31.25      |
| C44    | 25.96      | 33.26     | 30.2        | 29.29       | 30.12       | 31.13      | 31.6       |
| C45    | 25.79      | 31.54     | 30.81       | 29.06       | 29.79       | 29.06      | 29.16      |
| C46    | 25.89      | 32.85     | 30.31       | 29.42       | 31.58       | 29.69      | 28.87      |
| C47    | 25.52      | 31.47     | 28.88       | 29.55       | 30.56       | 28.56      | 29.38      |
| C48    | 24.88      | 31.71     | 29.11       | 31.35       | 29.84       | 27.38      | 29.95      |
| C49    | 25.57      |           | 29.76       | 30.06       | 30.19       | 29.57      | 30.9       |
| C50    | 25.89      | 30.26     | 29.8        | 30.28       | 30.58       | 30.25      | 29.99      |



|      |       |       |       |       |       |       |       |
|------|-------|-------|-------|-------|-------|-------|-------|
| C51  | 25.52 | 33.08 | 29.9  | 30.07 | 30.78 | 30.85 | 28.81 |
| C52  | 24.88 | 33.02 | 28.37 | 28.56 | 29.03 | 27.75 | 28.36 |
| C53  | 25.57 | 29.95 | 30.28 | 30.03 | 30.24 | 28.16 | 30.62 |
| C54  | 25.99 | 30.69 | 30.63 | 30.15 | 30.62 | 29.32 | 30.91 |
| C55  | 25.99 | 34.08 | 30.11 | 31.3  | 30.67 | 28.76 | 31.1  |
| C56  | 25.89 | 33.65 | 30.25 | 31.55 | 30.45 | 29.3  | 29.02 |
| C57  | 25.89 | 31.43 | 30.78 | 31.29 | 30.92 | 28.91 | 31.1  |
| C58  | 25.1  | 33.08 | 29.62 | 31.49 | 28.4  | 27.25 | 28.83 |
| C59  | 25.62 | 32.92 | 29.95 | 29.66 | 29.61 | 28.63 | 28.73 |
| C60  | 25.97 | 33.27 | 30.87 | 31.05 | 30.57 | 29.88 | 30.99 |
| C61  | 25.99 | 33.25 | 29.8  | 29.66 | 31.7  | 27.71 | 29.5  |
| C62  | 25.99 | 32.64 | 29.26 | 30.02 | 31.09 | 28.42 | 28.91 |
| C63  | 24.28 | 30.42 | 27.57 | 29.49 | 27.78 | 28.78 | 29.88 |
| C64  | 25.42 | 32.73 | 30.13 | 30.57 | 30.42 | 28.21 | 29.24 |
| C65  | 25.62 | 31.05 | 30.44 | 30.67 | 28.96 | 28.58 | 31.4  |
| C66  | 24.08 | 28.32 | 27.64 | 27.81 | 27.06 | 26.82 | 29.49 |
| C67  | 25.32 | 30.72 | 30.16 | 29.75 | 27.85 | 27.53 | 29.49 |
| C68  | 24.3  | 28.94 | 28.2  | 29.31 | 26.64 | 26.68 | 28.24 |
| C69  | 24.11 | 28.56 | 28.33 | 29.61 | 26.75 | 26.43 | 27.8  |
| C70  | 24.09 | 29.08 | 29.12 | 28.72 | 26.64 | 25.19 | 30.07 |
| C71  | 24.22 | 30.11 | 29.18 | 29.16 | 27.85 | 28.46 | 29.07 |
| C72  | 24.13 | 29.05 |       | 29.17 | 26.82 | 27.62 | 27.43 |
| C73  | 24.03 | 28.64 | 28.89 | 28.14 | 29.11 | 26.28 | 27.85 |
| C74  | 25.79 | 31.03 | 28.96 | 29.72 | 28.91 | 29.23 | 31.46 |
| C75  | 24.28 | 28.9  | 26.83 | 27.96 | 28.75 | 26.52 | 28.69 |
| C76  | 25.82 | 30.73 | 29.17 | 29.31 | 29.93 |       | 30.77 |
| C77  | 25.65 | 29.9  | 30.51 | 29.97 | 30.56 | 29.32 | 29.02 |
| C78  | 25.55 | 34.06 | 29    | 30.43 | 30.49 | 29.02 | 31.59 |
| C79  | 25.67 | 31.71 | 29.7  | 30.18 | 30.41 | 28.79 | 31.33 |
| C80  | 25.66 | 33.89 | 27.96 | 30.72 | 30.23 | 28.35 | 29.6  |
| C81  | 25.57 | 32.83 | 28.83 | 30.38 | 30.71 | 28.44 | 29.55 |
| C82  | 25.36 | 29.53 | 27.83 | 29.87 | 30.29 | 27.92 | 30.05 |
| C83  | 25.04 | 29.55 | 29.44 | 29.14 | 27.41 | 27.52 | 30.94 |
| C84  | 25.24 | 30.11 | 29.91 | 30.5  | 27.92 | 27.63 | 28.53 |
| C85  | 25.4  | 34.09 | 27.73 | 30.07 | 28.81 | 27.83 | 31.41 |
| C86  | 25.64 | 31.26 | 29.51 | 30.67 | 28.8  | 29.8  | 29.59 |
| C87  | 24.09 | 28.81 | 28.93 | 29.45 | 27.1  | 28.09 |       |
| C88  | 24.93 | 30.3  | 29.4  | 30.91 | 28.59 | 29.89 | 29.87 |
| C89  | 25.02 | 29.39 | 27.5  | 30.8  | 29.58 | 29.64 | 29.62 |
| C90  | 24.52 | 29.81 | 28.78 | 30.01 | 28.37 | 29.21 | 29.38 |
| C91  | 24.07 | 32.04 | 27.41 | 29.41 | 27.8  | 25.43 | 28.96 |
| C92  | 24.55 | 31.07 | 28.24 | 30.48 | 28.87 | 28.7  | 29.49 |
| C93  | 24.38 | 32.41 | 27.61 | 30.55 | 29.59 | 26.05 | 29.14 |
| C94  | 24.29 | 29.89 | 28.31 | 29.56 | 28.67 | 28.92 | 27.48 |
| C95  | 24.4  | 28.46 | 27.47 | 29.56 | 29.17 | 26.45 | 29.4  |
| C96  | 24.39 | 28.32 | 27.25 | 30.77 | 26.45 | 28.95 | 29.79 |
| C97  | 25.08 | 31.74 | 29.95 | 30.22 | 27.94 | 27.11 | 28.04 |
| C98  | 24.84 | 31.54 | 29.08 | 28.25 | 30.08 | 28.14 | 30.11 |
| C99  | 25.98 | 31.74 | 30.31 | 32    | 28.51 | 29.97 | 31.01 |
| C100 | 25.86 | 29.98 | 30.69 | 31.31 | 31.42 | 30.46 | 30.2  |
| C101 | 25.97 | 30.85 | 29.25 | 32.7  | 28.27 | 28.07 | 32.7  |
| C102 | 25.98 | 31.12 | 30.18 | 30.66 | 31.04 | 29.48 | 29.45 |
| C103 | 25.83 | 31.66 | 29.95 | 30.74 | 29.21 | 27.83 | 33.28 |
| C104 | 25.92 | 32.71 | 30.41 | 31.99 | 30.76 | 29.26 | 30.9  |

|      |       |       |       |       |       |       |       |
|------|-------|-------|-------|-------|-------|-------|-------|
| C105 | 25.76 | 33.17 |       | 29.85 | 30.68 | 28.74 | 30.52 |
| C106 | 25.56 | 31.51 | 30.17 | 29.58 | 30.57 | 28.09 | 29.87 |
| C107 | 25.68 | 32.6  | 29.4  | 31.95 | 30.36 | 28.02 | 30.22 |
| C108 | 24.72 | 32.87 | 29.4  | 30.43 | 29.76 | 27.36 | 28.42 |
| C109 | 25.07 | 33.49 | 29.98 | 30.12 | 29.41 | 27.62 | 29.53 |
| C110 | 24.14 | 31.62 | 28.23 | 28.93 | 28.37 | 27.77 | 31.48 |
| C111 | 25.07 | 32.77 | 29.09 | 29.6  | 28.42 | 27.76 | 28.87 |
| C112 | 25.06 | 30.09 | 28.61 | 29.47 | 28.57 | 27.08 | 29.12 |
| EP1  | 25.28 | 29.74 | 27.72 | 28.58 | 28.58 | 29.25 | 31.82 |
| EP2  | 24.82 | 29.92 | 27.23 | 27.9  | 27.9  | 27.39 | 32.16 |
| EP3  | 25.15 | 29.5  | 26.85 | 28.11 | 28.11 | 29.36 | 30.96 |
| EP4  | 25.04 | 28.46 | 27.55 | 27.61 | 27.61 | 27.78 | 31.92 |
| EP5  | 25.19 | 30.4  | 26.15 | 28.01 | 28.01 | 30.64 | 29.35 |
| EP6  | 25.29 | 28.95 | 28.01 | 28.97 | 28.97 | 30.16 | 33.49 |
| EP7  | 24.72 | 27.4  | 26.56 | 27.3  | 27.3  | 27.22 | 28.89 |
| EP8  | 24.07 | 28.44 | 26.08 | 27.58 | 27.58 | 26.81 | 28.84 |
| EP9  | 24.14 | 27.37 | 26.04 | 27.1  | 27.1  | 25.8  | 31.21 |
| EP10 | 24.07 | 31.96 | 25.8  | 27.13 | 27.13 | 26.02 | 30.43 |
| EP11 | 24.61 | 27.73 | 26.72 | 27.39 | 27.39 | 30.16 | 32.02 |
| EP12 | 25.71 | 28.8  | 26.83 | 28.11 | 28.11 | 28.05 | 31.78 |
| EP13 | 24.08 | 31.25 | 25.98 | 26.41 | 26.41 | 27.94 | 30.21 |
| EP14 | 24.16 | 28.24 | 26.17 | 26.24 | 26.24 | 29.34 | 30.14 |
| EP15 | 24.08 | 28.92 | 26.01 | 26.81 | 26.81 | 28.85 | 28.3  |
| EP16 | 25.04 | 28.76 | 26.93 | 27.89 | 27.89 | 32.99 | 31.49 |
| EP17 | 25.11 | 28.73 | 26.52 | 28.17 | 28.17 | 31.32 | 29.11 |
| EP18 | 25.08 | 28.51 | 26.75 | 27.85 | 27.85 | 33.49 | 30.55 |
| EP19 | 24.24 | 27.25 | 26.27 | 26.69 | 26.69 | 29.4  | 30.43 |
| EP20 | 24.23 | 28.44 | 25.99 | 26.87 | 26.87 | 29.35 | 28.89 |
| EP21 | 24.34 | 26.69 | 25.46 | 26.31 | 26.31 | 30.36 | 29.42 |
| EP22 | 24.56 | 28.63 | 25.72 | 26.5  | 26.5  | 26.54 | 27.99 |
| EP23 | 24.15 | 28.46 | 25.81 | 26.85 | 26.85 | 28.9  | 29.79 |
| EP24 | 24.22 | 28.73 | 25.68 | 27.02 | 27.02 | 25.39 |       |
| EP25 | 24.41 | 28.17 | 26.62 | 27.32 | 27.32 | 28.2  | 31.5  |
| EP26 | 25.01 | 28.57 | 26.49 | 27.48 | 27.48 | 33.14 | 30.31 |
| EP27 | 24.87 | 29.13 | 26.37 | 27.89 | 27.89 | 33.39 | 31.44 |
| EP28 | 24.37 | 29.84 | 25.74 | 27.25 | 27.25 | 27.95 | 32.11 |
| EP29 | 24.1  | 30.83 | 27.19 | 27.85 | 27.85 | 30.92 | 31.81 |
| EP30 | 24.11 | 27.51 | 25.33 | 28.08 | 28.08 | 28.32 | 31.24 |
| EP31 | 24.29 | 29.01 | 25.8  | 27.55 | 27.55 | 29.46 | 29.79 |
| EP32 | 24.31 | 29.75 | 25.61 | 27.75 | 27.75 | 29.73 | 32    |
| EP33 | 24.73 | 29.54 | 26.04 | 27.87 | 27.87 | 29.98 | 31.19 |
| EP34 | 24.84 | 28.32 | 26.12 | 27.92 | 27.92 | 30.52 | 31.52 |
| EP35 | 25.98 | 29.13 | 27.57 | 28.56 | 28.56 | 29.59 | 32.89 |
| EP36 | 25.86 | 28.98 | 27.89 | 28.37 | 28.37 | 29.32 | 31.29 |
| EP37 | 25.97 | 31.44 | 27.88 | 29.1  | 29.1  | 29.51 | 33.87 |
| EP38 | 25.98 | 30.48 | 27.26 | 28.76 | 28.76 | 28.91 | 33.65 |
| EP39 | 25.83 | 30.36 | 27.84 | 28.55 | 28.55 | 28.85 | 32.05 |
| EP40 | 25.92 | 30.17 | 28.6  | 28.04 | 28.04 | 29.26 | 30.2  |
| EP41 | 25.76 | 31.32 | 26.96 | 28.25 | 28.25 | 31.76 | 30.85 |
| EP42 | 25.56 | 30.57 | 26.69 | 27.75 | 27.75 | 28.71 | 29.8  |
| EP43 | 25.68 | 29.87 | 27.7  | 28.2  | 28.2  | 29.83 | 30.7  |
| EP44 | 24.72 | 29.83 | 25.73 | 26.69 | 26.69 | 30.27 | 30.14 |
| EP45 | 25.07 | 28.55 | 27.23 | 28.02 | 28.02 | 31.19 | 30.43 |
| EP46 | 24.14 | 27.5  | 25.53 | 27.14 | 27.14 | 30.54 | 31.37 |

|       |       |       |       |       |       |       |       |
|-------|-------|-------|-------|-------|-------|-------|-------|
| EP47  | 25.07 | 28.19 | 25.64 | 29.16 | 29.16 | 28.3  | 30.23 |
| EP48  | 25.06 | 28.3  | 26.99 | 28.7  | 28.7  | 29.02 | 31.48 |
| EP49  | 24.95 | 29.58 | 26.35 | 28.7  | 28.7  | 29.81 | 29.51 |
| EP50  | 24.74 | 26.93 | 27.11 | 28.9  | 28.9  | 29.24 | 29.31 |
| EP51  | 25.24 | 27.8  | 25.97 | 28.44 | 28.44 | 29.63 | 29.64 |
| EP52  | 24.06 | 27.68 | 24.71 | 27.54 | 27.54 | 28.53 | 31.16 |
| EP53  | 25.47 | 28.53 |       | 28.13 | 28.13 | 29.74 | 32.69 |
| EP54  | 24.26 | 29.15 | 25.01 | 26.86 | 26.86 | 27.93 | 29.69 |
| EP55  | 24.59 | 29.53 | 26.74 | 27.87 | 27.87 | 29.72 | 30.63 |
| EP56  | 24.29 | 29.32 | 26.57 | 27.66 | 27.66 | 30.28 | 30.14 |
| EP57  | 24.15 | 27.31 | 24.84 | 26.84 | 26.84 | 30.45 | 30.81 |
| EP58  | 25.79 | 29.36 | 27.82 | 28.71 | 28.71 | 32.52 | 31.93 |
| EP59  | 25.58 | 29.33 | 27.61 | 28.81 | 28.81 | 33    | 32.07 |
| EP60  | 25.86 | 29.24 | 27.99 | 29.11 | 29.11 | 32.96 | 32.06 |
| EP61  | 24.93 | 28.97 | 26.21 | 27.4  | 27.4  | 31.23 | 30.3  |
| EP62  | 24.23 | 28.14 | 26.52 | 27.96 | 27.96 | 31.62 | 31.66 |
| EP63  | 24.63 | 27.65 | 26.9  | 27.32 | 27.32 | 31.44 | 31.8  |
| EP64  | 24.66 | 27.93 | 26.78 | 26.81 | 26.81 | 31.63 | 31.37 |
| EP65  | 24.57 | 27.68 | 27.07 | 27.57 | 27.57 | 31.36 | 31.06 |
| EP66  | 24.15 | 28.2  | 27.01 | 28.06 | 28.06 | 28.17 | 32.54 |
| EP67  | 24.89 | 27.73 | 27.51 | 28.93 | 28.93 | 29.32 | 32.89 |
| EP68  | 25.08 | 29.63 | 27.47 | 29.15 | 29.15 | 28.97 | 31.99 |
| EP69  | 24.41 | 29.33 | 27.39 | 28.8  | 28.8  | 28.76 | 32.44 |
| EP70  | 24.01 | 29.02 | 24.63 | 28.93 | 28.93 | 28.39 | 30.51 |
| EP71  | 25.79 | 30.47 | 28.17 | 28.73 | 28.73 | 30.13 | 32.01 |
| EP72  | 24.35 | 29.39 | 25.51 | 26.82 | 26.82 | 29.38 | 32.68 |
| EP73  | 24.35 | 28.69 | 25.68 | 27.7  | 27.7  | 27.6  | 30.95 |
| EP74  | 24.9  | 27.13 | 25.45 | 27.88 | 27.88 | 28.01 | 32.18 |
| EP75  | 24.07 | 29.74 | 25.6  | 24.97 | 26.97 | 29.42 | 31.43 |
| EP76  | 25.01 | 28.48 | 26.31 | 28.51 | 28.51 | 28.37 | 32.97 |
| EP77  | 24.31 | 28.27 | 25.74 | 27.05 | 25.82 | 28.04 | 30.31 |
| EP78  | 24.44 | 30.29 | 25.82 | 28.62 | 25.74 | 28.77 | 30.63 |
| EP79  | 25.56 | 30.68 | 26.25 | 29.17 | 26.87 | 29.37 | 31.99 |
| EP80  | 24.14 | 28.41 | 26.31 | 27.31 | 25.42 | 27.75 | 30.4  |
| EP81  | 24.03 | 26.89 | 25.69 | 26.98 | 25.62 | 27.28 | 29.48 |
| EP82  | 24.84 | 28.89 | 28.01 | 28.08 | 26.87 | 30.02 | 30.97 |
| EP83  | 25.98 | 29.1  | 28.51 | 29.31 | 27.89 | 29.87 | 32.93 |
| EP84  | 24.72 | 29.56 | 27.96 | 28.04 | 26    | 29.89 | 30.22 |
| EP85  | 25.87 | 30.95 | 28.99 | 28.93 | 28.88 | 30.18 | 30.8  |
| EP86  | 24.11 | 27.23 | 26.44 | 27.28 | 24.79 | 27.64 | 31.86 |
| EP87  | 24.29 | 28.76 | 26.94 | 30.13 | 25.49 | 27.67 | 29.08 |
| EP88  | 24.68 | 28.79 | 27.07 | 28.29 | 25.81 | 27.68 | 30.12 |
| EP89  | 24.94 | 29.85 | 27.72 | 28.84 | 26.96 | 30.66 | 30.49 |
| EP90  | 25.86 | 30.8  | 29.86 | 30.69 | 28.87 | 29.68 | 32.4  |
| EP91  | 24.14 | 28.88 | 25.67 | 27.37 | 26.3  | 27.96 | 29.01 |
| EP92  | 25.47 | 30.04 | 26.99 | 28.96 | 26.86 | 29.71 | 30.71 |
| EP93  | 24.22 | 29.36 | 24.48 | 27.25 | 24.79 | 28.24 | 28.55 |
| EP94  | 25.91 | 30.84 | 27.61 | 30.03 | 27.84 | 29.4  | 30.74 |
| EP95  | 25.72 | 28.09 | 28.94 | 29.89 | 27.12 | 29.87 | 31    |
| EP96  | 24.27 | 26.95 | 28.1  | 29.11 | 26.64 | 30.21 | 31.22 |
| EP97  | 25.79 | 29.2  | 29.21 | 30.06 | 29.52 | 29.99 | 31.05 |
| EP98  | 25.89 | 29.05 | 29.36 | 30.18 | 29.54 | 30.85 | 31.82 |
| EP99  | 25.78 | 28.79 | 27.6  | 29.67 |       | 30.8  | 30.34 |
| EP100 | 25.91 | 29.57 | 28.43 | 30.07 | 28.66 | 31.11 | 31.11 |

|       |       |       |       |       |       |       |       |
|-------|-------|-------|-------|-------|-------|-------|-------|
| EP101 | 24.92 | 29.48 | 27.71 | 30.26 | 27.07 | 28.11 | 29.04 |
| EP102 | 25.24 | 29.09 | 27.72 | 30.04 | 27.52 | 28.28 | 29.73 |
| EP103 | 24.05 | 27.78 | 26.47 | 28.69 | 24.74 | 27.73 |       |
| EP104 | 24.1  | 28.42 | 26.25 | 28.52 | 25.13 | 28.48 | 29.71 |
| EP105 | 25.05 | 30.26 | 28.18 | 29.37 | 27.08 | 28.84 | 30.77 |
| EP106 | 24.88 | 29.26 | 27.76 | 29.81 | 27.01 | 27.74 | 33.09 |
| EP107 | 25.19 | 29.96 | 28.66 | 30.56 | 26.47 | 28.37 | 29.87 |
| EP108 | 24.24 | 26.3  | 25.8  | 27.99 | 26.53 | 29.62 | 29.15 |
| EP109 | 25.72 | 28.58 | 27.72 |       | 27.99 |       | 31.79 |
| EP110 | 24.07 | 29.31 | 25.36 | 27.55 | 26.19 | 27.97 | 28.16 |
| EP111 | 25.47 | 28    | 29.22 | 29.28 | 27.97 | 29.64 | 29.49 |
| EP112 | 25.73 | 31.29 | 28.45 | 28.95 | 28.59 | 29.96 | 32    |
| EP113 | 24.32 | 26.62 | 27.01 | 27.15 | 26.94 | 30.6  | 30.03 |
| EP114 | 25.39 | 30.45 | 29.05 | 29.02 | 27.78 | 30.53 | 30.44 |
| EP115 | 25.1  | 28.48 | 28.16 | 28.21 | 27.27 |       | 29.89 |
| EP116 | 25.89 | 30.73 | 28.95 | 29.11 | 27.55 | 31.49 | 30.42 |
| EP117 | 24.27 | 27.6  | 26.28 | 26.74 | 27.44 | 28.92 | 28.68 |

Abbreviation: All samples were measured in triplicates, and the Cq values we provided are the mean value. The blank spaces were those Cq values more than 36.

**Supplementary Table S3. Target genes of the 6 selected miRNAs.**

| miRNA_name    | target_name  | symo1        |
|---------------|--------------|--------------|
| hsa-let-7d-5p | NM_001080442 | SLC38A8      |
| hsa-let-7d-5p | NM_001029864 | KIAA1755     |
| hsa-let-7d-5p | NM_001102421 | ZFAND5       |
| hsa-let-7d-5p | NM_006007    | ZFAND5       |
| hsa-let-7d-5p | NM_001102420 | ZFAND5       |
| hsa-let-7d-5p | NM_207411    | XKR5         |
| hsa-let-7d-5p | NM_207364    | GPR148       |
| hsa-let-7d-5p | NM_006195    | PBX3         |
| hsa-let-7d-5p | NM_174911    | FAM84B       |
| hsa-let-7d-5p | NM_001624    | AIM1         |
| hsa-let-7d-5p | NM_001193552 | ZNF850       |
| hsa-let-7d-5p | NR_037596    | FLJ14186     |
| hsa-let-7d-5p | NM_005128    | DOPEY2       |
| hsa-let-7d-5p | NM_001134778 | PBX3         |
| hsa-let-7d-5p | NM_052888    | LRRC37B      |
| hsa-let-7d-5p | NR_038109    | SNHG16       |
| hsa-let-7d-5p | NR_038110    | SNHG16       |
| hsa-let-7d-5p | NR_038111    | SNHG16       |
| hsa-let-7d-5p | NR_038108    | SNHG16       |
| hsa-let-7d-5p | NM_001159293 | ZNF737       |
| hsa-let-7d-5p | NR_027299    | XPC          |
| hsa-let-7d-5p | NR_024122    | PBX3         |
| hsa-let-7d-5p | NR_024123    | PBX3         |
| hsa-let-7d-5p | NM_014215    | INSRR        |
| hsa-let-7d-5p | NR_038292    | LOC100507173 |
| hsa-let-7d-5p | NR_003654    | SCAND2       |
| hsa-let-7d-5p | NR_004859    | SCAND2       |
| hsa-let-7d-5p | NM_001008397 | GPX8         |
| hsa-let-7d-5p | NM_001242740 | LOC100507462 |
| hsa-let-7d-5p | NR_040054    | IQCH-AS1     |
| hsa-let-7d-5p | NR_040085    | TRG-AS1      |
| hsa-let-7d-5p | NM_001242928 | ZNF410       |
| hsa-let-7d-5p | NM_018212    | ENAH         |
| hsa-let-7d-5p | NM_001008493 | ENAH         |
| hsa-let-7d-5p | NM_001242924 | ZNF410       |
| hsa-let-7d-5p | NM_005630    | SLC02A1      |
| hsa-let-7d-5p | NM_014668    | GREB1        |
| hsa-let-7d-5p | NM_000343    | SLC5A1       |
| hsa-let-7d-5p | NR_033411    | SLC5A1       |
| hsa-let-7d-5p | NM_001034    | RRM2         |
| hsa-let-7d-5p | NM_004091    | E2F2         |
| hsa-let-7d-5p | NM_001652    | AQP6         |
| hsa-let-7d-5p | NM_001165931 | RRM2         |
| hsa-let-7d-5p | NM_153442    | GPR26        |
| hsa-let-7d-5p | NM_016124    | RHD          |
| hsa-let-7d-5p | NM_001874    | CPM          |
| hsa-let-7d-5p | NM_198320    | CPM          |
| hsa-let-7d-5p | NM_001005502 | CPM          |
| hsa-let-7d-5p | NM_021098    | CACNA1H      |
| hsa-let-7d-5p | NM_001005407 | CACNA1H      |

|               |              |           |
|---------------|--------------|-----------|
| hsa-let-7d-5p | NM_014228    | SLC6A7    |
| hsa-let-7d-5p | NM_001173452 | TFCP2     |
| hsa-let-7d-5p | NM_001173453 | TFCP2     |
| hsa-let-7d-5p | NM_014762    | DHCR24    |
| hsa-let-7d-5p | NM_005798    | TRIM13    |
| hsa-let-7d-5p | NM_052811    | TRIM13    |
| hsa-let-7d-5p | NM_213590    | TRIM13    |
| hsa-let-7d-5p | NM_004707    | ATG12     |
| hsa-let-7d-5p | NR_033362    | ATG12     |
| hsa-let-7d-5p | NR_033363    | ATG12     |
| hsa-let-7d-5p | NM_000859    | HMGCR     |
| hsa-let-7d-5p | NM_001947    | DUSP7     |
| hsa-let-7d-5p | NM_001130996 | HMGCR     |
| hsa-let-7d-5p | NM_001008530 | LGMN      |
| hsa-let-7d-5p | NM_001395    | DUSP9     |
| hsa-let-7d-5p | NM_005787    | ALG3      |
| hsa-let-7d-5p | NM_001006941 | ALG3      |
| hsa-let-7d-5p | NR_024533    | ALG3      |
| hsa-let-7d-5p | NR_024534    | ALG3      |
| hsa-let-7d-5p | NM_001163    | APBA1     |
| hsa-let-7d-5p | NM_001139    | ALOX12B   |
| hsa-let-7d-5p | NM_001382    | DPAGT1    |
| hsa-let-7d-5p | NM_014830    | ZBTB39    |
| hsa-let-7d-5p | NM_182907    | PRDM1     |
| hsa-let-7d-5p | NM_014834    | LRRC37A   |
| hsa-let-7d-5p | NM_005610    | RBBP4     |
| hsa-let-7d-5p | NM_001135255 | RBBP4     |
| hsa-let-7d-5p | NM_001135256 | RBBP4     |
| hsa-let-7d-5p | NM_001127691 | RHD       |
| hsa-let-7d-5p | NR_015451    | LINC00294 |
| hsa-let-7d-5p | NM_001168335 | ME2       |
| hsa-let-7d-5p | NM_001168335 | ME2       |
| hsa-let-7d-5p | NM_004996    | ABCC1     |
| hsa-let-7d-5p | NM_019900    | ABCC1     |
| hsa-let-7d-5p | NM_000172    | GNAT1     |
| hsa-let-7d-5p | NM_019862    | ABCC1     |
| hsa-let-7d-5p | NM_144499    | GNAT1     |
| hsa-let-7d-5p | NM_019899    | ABCC1     |
| hsa-let-7d-5p | NM_019898    | ABCC1     |
| hsa-let-7d-5p | NM_012193    | FZD4      |
| hsa-let-7d-5p | NM_003922    | HERC1     |
| hsa-let-7d-5p | NM_004391    | CYP8B1    |
| hsa-let-7d-5p | NM_014244    | ADAMTS2   |
| hsa-let-7d-5p | NM_002396    | ME2       |
| hsa-let-7d-5p | NM_002396    | ME2       |
| hsa-let-7d-5p | NM_005121    | MED13     |
| hsa-let-7d-5p | NM_004101    | F2RL2     |
| hsa-let-7d-5p | NM_001198    | PRDM1     |
| hsa-let-7d-5p | NM_002268    | KPNA4     |
| hsa-let-7d-5p | NM_003417    | ZNF264    |
| hsa-let-7d-5p | NM_002881    | RALB      |
| hsa-let-7d-5p | NM_004532    | MUC4      |
| hsa-let-7d-5p | NM_138297    | MUC4      |
| hsa-let-7d-5p | NM_006286    | TFDP2     |

|               |              |          |
|---------------|--------------|----------|
| hsa-let-7d-5p | NM_018406    | MUC4     |
| hsa-let-7d-5p | NM_001178138 | TFDP2    |
| hsa-let-7d-5p | NM_007292    | ACOX1    |
| hsa-let-7d-5p | NM_001178139 | TFDP2    |
| hsa-let-7d-5p | NM_004035    | ACOX1    |
| hsa-let-7d-5p | NM_005374    | MPP2     |
| hsa-let-7d-5p | NM_001178140 | TFDP2    |
| hsa-let-7d-5p | NM_001185039 | ACOX1    |
| hsa-let-7d-5p | NM_001178141 | TFDP2    |
| hsa-let-7d-5p | NM_004714    | DYRK1B   |
| hsa-let-7d-5p | NM_001178142 | TFDP2    |
| hsa-let-7d-5p | NM_002972    | SBF1     |
| hsa-let-7d-5p | NM_001007278 | TRIM13   |
| hsa-let-7d-5p | NM_001640    | APEH     |
| hsa-let-7d-5p | NM_002337    | LRPAP1   |
| hsa-let-7d-5p | NM_014712    | SETD1A   |
| hsa-let-7d-5p | NM_000821    | GGCX     |
| hsa-let-7d-5p | NM_001142269 | GGCX     |
| hsa-let-7d-5p | NR_037570    | NFS1     |
| hsa-let-7d-5p | NM_005540    | INPP5B   |
| hsa-let-7d-5p | NM_005540    | INPP5B   |
| hsa-let-7d-5p | NR_027409    | GOLGA8A  |
| hsa-let-7d-5p | NM_012264    | TMEM184B |
| hsa-let-7d-5p | NM_007283    | MGLL     |
| hsa-let-7d-5p | NM_001195071 | TMEM184B |
| hsa-let-7d-5p | NM_001003794 | MGLL     |
| hsa-let-7d-5p | NM_001195072 | TMEM184B |
| hsa-let-7d-5p | NM_018247    | TMEM30A  |
| hsa-let-7d-5p | NM_007347    | AP4E1    |
| hsa-let-7d-5p | NM_016324    | ZNF274   |
| hsa-let-7d-5p | NM_016325    | ZNF274   |
| hsa-let-7d-5p | NM_014939    | TRAPPC8  |
| hsa-let-7d-5p | NM_018217    | EDEM2    |
| hsa-let-7d-5p | NM_001145025 | EDEM2    |
| hsa-let-7d-5p | NM_012320    | PLA2G15  |
| hsa-let-7d-5p | NM_018390    | PLCXD1   |
| hsa-let-7d-5p | NM_018390    | PLCXD1   |
| hsa-let-7d-5p | NM_133502    | ZNF274   |
| hsa-let-7d-5p | NM_018662    | DISC1    |
| hsa-let-7d-5p | NM_001012957 | DISC1    |
| hsa-let-7d-5p | NM_015506    | MMACHC   |
| hsa-let-7d-5p | NM_015177    | DTX4     |
| hsa-let-7d-5p | NM_015409    | EP400    |
| hsa-let-7d-5p | NM_014982    | PCNX     |
| hsa-let-7d-5p | NM_001195610 | DCDC2    |
| hsa-let-7d-5p | NM_020914    | RNF213   |
| hsa-let-7d-5p | NM_015490    | SEC31B   |
| hsa-let-7d-5p | NM_018129    | PNPO     |
| hsa-let-7d-5p | NM_017728    | TMEM104  |
| hsa-let-7d-5p | NM_022047    | DEF6     |
| hsa-let-7d-5p | NM_014339    | IL17RA   |
| hsa-let-7d-5p | NM_183416    | KIF1B    |
| hsa-let-7d-5p | NM_017672    | TRPM7    |
| hsa-let-7d-5p | NM_006589    | FAM189B  |

|               |              |           |
|---------------|--------------|-----------|
| hsa-let-7d-5p | NR_026728    | EDEM2     |
| hsa-let-7d-5p | NM_198264    | FAM189B   |
| hsa-let-7d-5p | NM_001143958 | TMEM30A   |
| hsa-let-7d-5p | NM_019018    | FAM105A   |
| hsa-let-7d-5p | NM_017964    | SLC30A6   |
| hsa-let-7d-5p | NM_001193513 | SLC30A6   |
| hsa-let-7d-5p | NM_021180    | GRHL3     |
| hsa-let-7d-5p | NM_015029    | POP1      |
| hsa-let-7d-5p | NM_001193514 | SLC30A6   |
| hsa-let-7d-5p | NM_198173    | GRHL3     |
| hsa-let-7d-5p | NM_001145860 | POP1      |
| hsa-let-7d-5p | NM_001145861 | POP1      |
| hsa-let-7d-5p | NM_001193515 | SLC30A6   |
| hsa-let-7d-5p | NM_001195010 | GRHL3     |
| hsa-let-7d-5p | NM_014049    | ACAD9     |
| hsa-let-7d-5p | NM_177538    | CYP20A1   |
| hsa-let-7d-5p | NR_033426    | ACAD9     |
| hsa-let-7d-5p | NM_020119    | ZC3HAV1   |
| hsa-let-7d-5p | NM_006871    | RIPK3     |
| hsa-let-7d-5p | NM_012153    | EHF       |
| hsa-let-7d-5p | NM_001206615 | EHF       |
| hsa-let-7d-5p | NM_018411    | HR        |
| hsa-let-7d-5p | NM_005144    | HR        |
| hsa-let-7d-5p | NM_015540    | RPAP1     |
| hsa-let-7d-5p | NM_006628    | ARPP19    |
| hsa-let-7d-5p | NM_016356    | DCDC2     |
| hsa-let-7d-5p | NM_013302    | EEF2K     |
| hsa-let-7d-5p | NM_001164537 | DISC1     |
| hsa-let-7d-5p | NM_001164540 | DISC1     |
| hsa-let-7d-5p | NM_001007561 | IRGQ      |
| hsa-let-7d-5p | NM_024674    | LIN28A    |
| hsa-let-7d-5p | NR_002328    | GNRHR2    |
| hsa-let-7d-5p | NM_144578    | MAPK1IP1L |
| hsa-let-7d-5p | NM_145034    | TOR1AIP2  |
| hsa-let-7d-5p | NM_148886    | SMCR7     |
| hsa-let-7d-5p | NM_001199260 | TOR1AIP2  |
| hsa-let-7d-5p | NM_030784    | GPR63     |
| hsa-let-7d-5p | NM_001144900 | SMCR7     |
| hsa-let-7d-5p | NM_025188    | TRIM45    |
| hsa-let-7d-5p | NM_001145635 | TRIM45    |
| hsa-let-7d-5p | NM_001167942 | TNFAIP8L1 |
| hsa-let-7d-5p | NM_030640    | DUSP16    |
| hsa-let-7d-5p | NM_152362    | TNFAIP8L1 |
| hsa-let-7d-5p | NM_032826    | SLC35B4   |
| hsa-let-7d-5p | NM_139162    | SMCR7     |
| hsa-let-7d-5p | NM_032116    | KATNAL1   |
| hsa-let-7d-5p | NM_001014380 | KATNAL1   |
| hsa-let-7d-5p | NM_032828    | ZNF587    |
| hsa-let-7d-5p | NM_001204817 | ZNF587    |
| hsa-let-7d-5p | NM_024341    | ZNF557    |
| hsa-let-7d-5p | NM_001044387 | ZNF557    |
| hsa-let-7d-5p | NM_033655    | CNTNAP3   |
| hsa-let-7d-5p | NM_001044388 | ZNF557    |
| hsa-let-7d-5p | NM_031220    | PITPNM3   |



|               |              |           |
|---------------|--------------|-----------|
| hsa-let-7d-5p | NM_022918    | TMEM135   |
| hsa-let-7d-5p | NM_001168724 | TMEM135   |
| hsa-let-7d-5p | NR_033149    | TMEM135   |
| hsa-let-7d-5p | NM_032866    | CGNL1     |
| hsa-let-7d-5p | NM_033401    | CNTNAP4   |
| hsa-let-7d-5p | NM_017784    | OSBPL10   |
| hsa-let-7d-5p | NM_001174060 | OSBPL10   |
| hsa-let-7d-5p | NM_001099694 | ZNF578    |
| hsa-let-7d-5p | NM_001206670 | PLA2G4E   |
| hsa-let-7d-5p | NM_020877    | DNAH2     |
| hsa-let-7d-5p | NM_024884    | L2HGDH    |
| hsa-let-7d-5p | NR_015409    | LOC143188 |
| hsa-let-7d-5p | NM_152336    | AGBL1     |
| hsa-let-7d-5p | NM_001040653 | ZXDC      |
| hsa-let-7d-5p | NM_001143957 | GPR63     |
| hsa-let-7d-5p | NM_199454    | PRDM16    |
| hsa-let-7d-5p | NM_022114    | PRDM16    |
| hsa-let-7d-5p | NM_207322    | C2CD4A    |
| hsa-let-7d-5p | NM_033122    | CABS1     |
| hsa-let-7d-5p | NM_024740    | ALG9      |
| hsa-let-7d-5p | NM_001077690 | ALG9      |
| hsa-let-7d-5p | NM_001077691 | ALG9      |
| hsa-let-7d-5p | NM_001077692 | ALG9      |
| hsa-let-7d-5p | NM_001034841 | ITPRIPL2  |
| hsa-let-7d-5p | NR_028028    | ITPRIPL2  |
| hsa-let-7d-5p | NM_032717    | AGPAT9    |
| hsa-let-7d-5p | NM_173495    | PTCHD1    |
| hsa-let-7d-5p | NM_153366    | SVEP1     |
| hsa-let-7d-5p | NM_001080457 | LRRC4B    |
| hsa-let-7d-5p | NM_138400    | NOM1      |
| hsa-let-7d-5p | NM_001165966 | PITPNM3   |
| hsa-let-7d-5p | NM_080876    | DUSP19    |
| hsa-let-7d-5p | NM_080876    | DUSP19    |
| hsa-let-7d-5p | NM_080876    | DUSP19    |
| hsa-let-7d-5p | NM_001142314 | DUSP19    |
| hsa-let-7d-5p | NM_001142314 | DUSP19    |
| hsa-let-7d-5p | NM_001142314 | DUSP19    |
| hsa-let-7d-5p | NM_001105195 | FAM123C   |
| hsa-let-7d-5p | NM_001105194 | FAM123C   |
| hsa-let-7d-5p | NM_001105193 | FAM123C   |
| hsa-let-7d-5p | NM_152698    | FAM123C   |
| hsa-let-7d-5p | NM_144613    | COX6B2    |
| hsa-let-7d-5p | NM_032237    | SGK196    |
| hsa-let-7d-5p | NM_001005210 | LRRC55    |
| hsa-let-7d-5p | NM_001197026 | PLEKHA8   |
| hsa-let-7d-5p | NM_022834    | VWA1      |
| hsa-let-7d-5p | NM_199121    | VWA1      |
| hsa-let-7d-5p | NM_023018    | NADK      |
| hsa-let-7d-5p | NM_001198993 | NADK      |
| hsa-let-7d-5p | NM_001198994 | NADK      |
| hsa-let-7d-5p | NM_138994    | CNTNAP4   |
| hsa-let-7d-5p | NM_152616    | TRIM42    |
| hsa-let-7d-5p | NR_003525    | LRRC37A6P |
| hsa-let-7d-5p | NR_038970    | LINC00641 |

|               |              |               |
|---------------|--------------|---------------|
| hsa-let-7d-5p | NR_038971    | LINC00641     |
| hsa-let-7d-5p | NM_001010891 | MTX3          |
| hsa-let-7d-5p | NM_001167741 | MTX3          |
| hsa-let-7d-5p | NM_182580    | CYB561D1      |
| hsa-let-7d-5p | NM_001134400 | CYB561D1      |
| hsa-let-7d-5p | NM_001134402 | CYB561D1      |
| hsa-let-7d-5p | NM_001134403 | CYB561D1      |
| hsa-let-7d-5p | NM_001134404 | CYB561D1      |
| hsa-let-7d-5p | NR_024207    | KIAA1875      |
| hsa-let-7d-5p | NM_207454    | C17orf102     |
| hsa-let-7d-5p | NR_024497    | LOC399744     |
| hsa-let-7d-5p | NM_198514    | NHLRC2        |
| hsa-let-7d-5p | NM_207396    | RNF207        |
| hsa-let-7d-5p | NM_173827    | COX18         |
| hsa-let-7d-5p | NR_027033    | MIRLET7BHG    |
| hsa-let-7d-5p | NM_199340    | LRRC37A3      |
| hsa-let-7d-5p | NM_199340    | LRRC37A3      |
| hsa-let-7d-5p | NM_198580    | SLC27A1       |
| hsa-let-7d-5p | NM_173570    | ZDHHC23       |
| hsa-let-7d-5p | NM_152778    | MFSB8         |
| hsa-let-7d-5p | NM_173654    | EOGT          |
| hsa-let-7d-5p | NM_178173    | CCDC36        |
| hsa-let-7d-5p | NM_178518    | TMEM102       |
| hsa-let-7d-5p | NM_173689    | CRB2          |
| hsa-let-7d-5p | NM_173593    | B4GALNT3      |
| hsa-let-7d-5p | NR_027410    | GOLGA8B       |
| hsa-let-7d-5p | NR_033738    | LOC440300     |
| hsa-let-7d-5p | NM_001012659 | ARGFX         |
| hsa-let-7d-5p | NM_001006607 | LRRC37A2      |
| hsa-let-7d-5p | NR_033834    | FLJ31485      |
| hsa-let-7d-5p | NM_001201380 | CNTNAP3B      |
| hsa-let-7d-5p | NM_001144989 | ZNF814        |
| hsa-let-7d-5p | NR_038343    | MAGI2-AS3     |
| hsa-let-7d-5p | NR_028393    | TSNAX-DISC1   |
| hsa-let-7d-5p | NR_037928    | P2RX5-TAX1BP3 |
| hsa-let-7d-5p | NR_033378    | LOC100288428  |
| hsa-let-7d-5p | NM_181701    | QSOX2         |
| hsa-let-7d-5p | NM_013389    | NPC1L1        |
| hsa-let-7d-5p | NM_001621    | AHR           |
| hsa-let-7d-5p | NM_144997    | FLCN          |
| hsa-let-7d-5p | NM_001020818 | MYADM         |
| hsa-let-7d-5p | NM_001020819 | MYADM         |
| hsa-let-7d-5p | NM_001135659 | NRXN1         |
| hsa-let-7d-5p | NM_004801    | NRXN1         |
| hsa-let-7d-5p | NM_014683    | ULK2          |
| hsa-let-7d-5p | NM_177438    | DICER1        |
| hsa-let-7d-5p | NM_030621    | DICER1        |
| hsa-let-7d-5p | NM_000903    | NQO1          |
| hsa-let-7d-5p | NM_001025433 | NQO1          |
| hsa-let-7d-5p | NM_001025434 | NQO1          |
| hsa-let-7d-5p | NM_003907    | EIF2B5        |
| hsa-let-7d-5p | NM_001034173 | ALDH1L2       |
| hsa-let-7d-5p | NR_027752    | ALDH1L2       |
| hsa-let-7d-5p | NM_002697    | POU2F1        |

|                 |              |           |
|-----------------|--------------|-----------|
| hsa-let-7d-5p   | NM_001198783 | POU2F1    |
| hsa-let-7d-5p   | NM_001198786 | POU2F1    |
| hsa-let-7d-5p   | NR_037163    | POU2F1    |
| hsa-let-7d-5p   | NM_022817    | PER2      |
| hsa-let-7d-5p   | NM_001195573 | DICER1    |
| hsa-let-7d-5p   | NM_005653    | TFCP2     |
| hsa-let-7d-5p   | NM_022905    | TTC23     |
| hsa-let-7d-5p   | NM_001040655 | TTC23     |
| hsa-let-7d-5p   | NM_001040658 | TTC23     |
| hsa-let-7d-5p   | NM_001204172 | MDM4      |
| hsa-let-7d-5p   | NM_002011    | FGFR4     |
| hsa-let-7d-5p   | NM_213647    | FGFR4     |
| hsa-let-7d-5p   | NM_017617    | NOTCH1    |
| hsa-let-7d-5p   | NR_002728    | KCNQ10T1  |
| hsa-let-7d-5p   | NM_005497    | GJC1      |
| hsa-let-7d-5p   | NM_001080383 | GJC1      |
| hsa-let-7d-5p   | NM_022963    | FGFR4     |
| hsa-let-7d-5p   | NM_000552    | VWF       |
| hsa-let-7d-5p   | NM_002205    | ITGA5     |
| hsa-let-7d-5p   | NM_022842    | CDCP1     |
| hsa-let-7d-5p   | NM_000870    | HTR4      |
| hsa-let-7d-5p   | NM_001040173 | HTR4      |
| hsa-let-7d-5p   | NM_003213    | TEAD4     |
| hsa-let-7d-5p   | NM_201441    | TEAD4     |
| hsa-let-7d-5p   | NM_201443    | TEAD4     |
| hsa-let-7d-5p   | NM_002392    | MDM2      |
| hsa-let-7d-5p   | NM_002393    | MDM4      |
| hsa-let-7d-5p   | NR_024171    | MDM4      |
| hsa-let-7d-5p   | NM_001204171 | MDM4      |
| hsa-let-7d-5p   | NR_003570    | FLJ46361  |
| hsa-let-7d-5p   | NR_027240    | LOC730668 |
| hsa-let-7d-5p   | NR_026804    | FLJ13197  |
| hsa-let-7d-5p   | NM_004628    | XPC       |
| hsa-let-7d-5p   | NM_001145769 | XPC       |
| hsa-let-7d-5p   | NM_001031854 | ACCSL     |
| hsa-let-7d-5p   | NR_034027    | LOC338739 |
| hsa-let-7d-5p   | NR_036536    | SNHG4     |
| hsa-let-7d-5p   | NR_003141    | SNHG4     |
| hsa-let-7d-5p   | NR_027765    | SBF1P1    |
| hsa-let-7d-5p   | NM_003496    | TRRAP     |
| hsa-let-7d-5p   | NM_001244580 | TRRAP     |
| hsa-miR-106b-5p | NM_178457    | ZNF831    |
| hsa-miR-106b-5p | NM_022112    | TP53AIP1  |
| hsa-miR-106b-5p | NM_001195195 | TP53AIP1  |
| hsa-miR-106b-5p | NM_175056    | ZPLD1     |
| hsa-miR-106b-5p | NM_004226    | STK17B    |
| hsa-miR-106b-5p | NR_027673    | ADARB1    |
| hsa-miR-106b-5p | NM_001105244 | PTPRM     |
| hsa-miR-106b-5p | NM_000051    | ATM       |
| hsa-miR-106b-5p | NR_027672    | ADARB1    |
| hsa-miR-106b-5p | NM_001112    | ADARB1    |
| hsa-miR-106b-5p | NM_015833    | ADARB1    |
| hsa-miR-106b-5p | NM_015834    | ADARB1    |
| hsa-miR-106b-5p | NR_027674    | ADARB1    |

|                 |              |            |
|-----------------|--------------|------------|
| hsa-miR-106b-5p | NM_001160230 | ADARB1     |
| hsa-miR-106b-5p | NM_133178    | PTPRU      |
| hsa-miR-106b-5p | NM_133177    | PTPRU      |
| hsa-miR-106b-5p | NM_005704    | PTPRU      |
| hsa-miR-106b-5p | NM_001195001 | PTPRU      |
| hsa-miR-106b-5p | NM_014798    | PLEKHM1    |
| hsa-miR-106b-5p | NR_027774    | PLEKHM1    |
| hsa-miR-106b-5p | NR_027782    | PLEKHM1    |
| hsa-miR-106b-5p | NM_004631    | LRP8       |
| hsa-miR-106b-5p | NM_001018054 | LRP8       |
| hsa-miR-106b-5p | NM_033300    | LRP8       |
| hsa-miR-106b-5p | NM_207123    | GAB1       |
| hsa-miR-106b-5p | NM_002039    | GAB1       |
| hsa-miR-106b-5p | NM_002845    | PTPRM      |
| hsa-miR-106b-5p | NM_017522    | LRP8       |
| hsa-miR-106b-5p | NM_005027    | PIK3R2     |
| hsa-miR-106b-5p | NM_018240    | KIRREL     |
| hsa-miR-106b-5p | NM_017757    | ZNF407     |
| hsa-miR-106b-5p | NM_001146189 | ZNF407     |
| hsa-miR-106b-5p | NM_001226    | CASP6      |
| hsa-miR-106b-5p | NM_032992    | CASP6      |
| hsa-miR-106b-5p | NM_001007267 | PLA2R1     |
| hsa-miR-106b-5p | NM_001195641 | PLA2R1     |
| hsa-miR-106b-5p | NM_001128608 | MAPKBP1    |
| hsa-miR-106b-5p | NM_001039199 | TTPAL      |
| hsa-miR-106b-5p | NM_172207    | CAMKK1     |
| hsa-miR-106b-5p | NM_032116    | KATNAL1    |
| hsa-miR-106b-5p | NM_001014380 | KATNAL1    |
| hsa-miR-106b-5p | NM_052859    | RFT1       |
| hsa-miR-106b-5p | NM_024756    | MMRN2      |
| hsa-miR-106b-5p | NR_037633    | GJA9-MYCBP |
| hsa-miR-106b-5p | NR_037634    | GJA9-MYCBP |
| hsa-miR-106b-5p | NR_037146    | TNFSF12    |
| hsa-miR-106b-5p | NM_003809    | TNFSF12    |
| hsa-miR-106b-5p | NM_005204    | MAP3K8     |
| hsa-miR-130a-3p | NM_032160    | DSEL       |
| hsa-miR-130a-3p | NM_000876    | IGF2R      |
| hsa-miR-130a-3p | NM_016491    | MRPL37     |
| hsa-miR-130a-3p | NM_001080431 | SLC45A4    |
| hsa-miR-130a-3p | NM_015029    | POP1       |
| hsa-miR-130a-3p | NM_001145860 | POP1       |
| hsa-miR-130a-3p | NM_001145861 | POP1       |
| hsa-miR-130a-3p | NR_029498    | MIR25      |
| hsa-miR-146a-5p | NM_004775    | B4GALT6    |
| hsa-miR-146a-5p | NM_001025242 | IRAK1      |
| hsa-miR-146a-5p | NM_001025243 | IRAK1      |
| hsa-miR-146a-5p | NM_025259    | MSH5       |
| hsa-miR-146a-5p | NM_172165    | MSH5       |
| hsa-miR-146a-5p | NM_001296    | CCBP2      |
| hsa-miR-146a-5p | NM_019024    | HEATR5B    |
| hsa-miR-146a-5p | NM_016267    | VGLL1      |
| hsa-miR-146a-5p | NM_020693    | DSCAML1    |
| hsa-miR-146a-5p | NM_001083614 | EARS2      |
| hsa-miR-146a-5p | NR_003501    | EARS2      |

|                 |              |               |
|-----------------|--------------|---------------|
| hsa-miR-146a-5p | NM_153212    | GJB4          |
| hsa-miR-146a-5p | NM_030630    | HID1          |
| hsa-miR-146a-5p | NM_001001694 | IL17REL       |
| hsa-miR-146a-5p | NM_003954    | MAP3K14       |
| hsa-miR-146a-5p | NR_037846    | MSH5-SAPCD1   |
| hsa-miR-146a-5p | NM_014983    | HMGXB3        |
| hsa-miR-146a-5p | NM_001037131 | AGAP1         |
| hsa-miR-146a-5p | NM_014914    | AGAP1         |
| hsa-miR-15a-5p  | NM_001005405 | KRTAP5-11     |
| hsa-miR-15a-5p  | NM_001012709 | KRTAP5-4      |
| hsa-miR-15a-5p  | NM_001012710 | KRTAP5-10     |
| hsa-miR-15a-5p  | NM_001012416 | KRTAP5-6      |
| hsa-miR-15a-5p  | NM_021046    | KRTAP5-8      |
| hsa-miR-15a-5p  | NM_001001480 | KRTAP5-5      |
| hsa-miR-15a-5p  | NM_001012503 | KRTAP5-7      |
| hsa-miR-15a-5p  | NM_001012708 | KRTAP5-3      |
| hsa-miR-15a-5p  | NM_001005922 | KRTAP5-1      |
| hsa-miR-15a-5p  | NM_152833    | C9orf69       |
| hsa-miR-15a-5p  | NM_030626    | LRRC27        |
| hsa-miR-15a-5p  | NM_001143757 | LRRC27        |
| hsa-miR-15a-5p  | NM_032173    | ZNRF3         |
| hsa-miR-15a-5p  | NM_001206998 | ZNRF3         |
| hsa-miR-15a-5p  | NM_015680    | CNPPD1        |
| hsa-miR-15a-5p  | NM_001032221 | STXBP1        |
| hsa-miR-15a-5p  | NM_003165    | STXBP1        |
| hsa-miR-15a-5p  | NM_005877    | SF3A1         |
| hsa-miR-15a-5p  | NM_001005409 | SF3A1         |
| hsa-miR-15a-5p  | NM_002045    | GAP43         |
| hsa-miR-15a-5p  | NM_001130064 | GAP43         |
| hsa-miR-15a-5p  | NM_005553    | KRTAP5-9      |
| hsa-miR-15a-5p  | NM_000833    | GRIN2A        |
| hsa-miR-15a-5p  | NM_001185077 | ARHGDI1       |
| hsa-miR-15a-5p  | NM_001185078 | ARHGDI1       |
| hsa-miR-15a-5p  | NM_005919    | MEF2BNB-MEF2B |
| hsa-miR-15a-5p  | NR_027307    | MEF2BNB-MEF2B |
| hsa-miR-15a-5p  | NR_027308    | MEF2BNB-MEF2B |
| hsa-miR-15a-5p  | NM_002590    | PCDH8         |
| hsa-miR-15a-5p  | NM_032949    | PCDH8         |
| hsa-miR-15a-5p  | NM_006826    | YWHAQ         |
| hsa-miR-15a-5p  | NM_005501    | ITGA3         |
| hsa-miR-15a-5p  | NM_002204    | ITGA3         |
| hsa-miR-15a-5p  | NM_017736    | THUMPDI       |
| hsa-miR-15a-5p  | NM_015937    | PIGT          |
| hsa-miR-15a-5p  | NM_001184728 | PIGT          |
| hsa-miR-15a-5p  | NM_001184729 | PIGT          |
| hsa-miR-15a-5p  | NM_001184730 | PIGT          |
| hsa-miR-15a-5p  | NM_024490    | ATP10A        |
| hsa-miR-15a-5p  | NM_018199    | EXD2          |
| hsa-miR-15a-5p  | NM_017982    | SUSD4         |
| hsa-miR-15a-5p  | NM_001193360 | EXD2          |
| hsa-miR-15a-5p  | NM_001193361 | EXD2          |
| hsa-miR-15a-5p  | NM_001193362 | EXD2          |
| hsa-miR-15a-5p  | NM_001193363 | EXD2          |
| hsa-miR-15a-5p  | NR_034164    | EXD2          |

|                |              |           |
|----------------|--------------|-----------|
| hsa-miR-15a-5p | NR_034165    | EXD2      |
| hsa-miR-15a-5p | NM_015531    | C2CD3     |
| hsa-miR-15a-5p | NR_003266    | LOC220729 |
| hsa-miR-15a-5p | NM_080552    | SLC32A1   |
| hsa-miR-15a-5p | NM_024575    | TNFAIP8L2 |
| hsa-miR-15a-5p | NM_024980    | GPR157    |
| hsa-miR-15a-5p | NM_138697    | TAS1R1    |
| hsa-miR-15a-5p | NM_022117    | TSPYL2    |
| hsa-miR-15a-5p | NM_052902    | STK11IP   |
| hsa-miR-15a-5p | NM_031935    | HMCN1     |
| hsa-miR-15a-5p | NM_130759    | GIMAP1    |
| hsa-miR-15a-5p | NM_001142935 | MXD3      |
| hsa-miR-15a-5p | NM_152228    | TAS1R3    |
| hsa-miR-15a-5p | NM_173569    | UBN2      |
| hsa-miR-15a-5p | NR_029663    | MIR15B    |
| hsa-miR-15a-5p | NM_182632    | SLC6A18   |
| hsa-miR-15a-5p | NM_001145026 | PTPRQ     |
| hsa-miR-15a-5p | NM_173567    | EPHX4     |
| hsa-miR-15a-5p | NM_001145785 | MEF2B     |
| hsa-miR-15a-5p | NM_014324    | AMACR     |
| hsa-miR-15a-5p | NM_203382    | AMACR     |
| hsa-miR-15a-5p | NM_001167595 | AMACR     |
| hsa-miR-15a-5p | NM_003072    | SMARCA4   |
| hsa-miR-15a-5p | NM_001128844 | SMARCA4   |
| hsa-miR-15a-5p | NM_001128845 | SMARCA4   |
| hsa-miR-15a-5p | NM_001128846 | SMARCA4   |
| hsa-miR-15a-5p | NM_001128847 | SMARCA4   |
| hsa-miR-15a-5p | NM_001128848 | SMARCA4   |
| hsa-miR-15a-5p | NM_001128849 | SMARCA4   |
| hsa-miR-15a-5p | NM_002998    | SDC2      |
| hsa-miR-15a-5p | NM_004168    | SDHA      |
| hsa-miR-15a-5p | NM_000255    | MUT       |
| hsa-miR-15a-5p | NM_003920    | TIMELESS  |
| hsa-miR-15a-5p | NM_015225    | PRUNE2    |
| hsa-miR-15a-5p | NM_033637    | BTRC      |
| hsa-miR-15a-5p | NM_152594    | SPRED1    |
| hsa-miR-15a-5p | NM_004613    | TGM2      |
| hsa-miR-15a-5p | NM_198951    | TGM2      |
| hsa-miR-15a-5p | NM_003939    | BTRC      |
| hsa-miR-15a-5p | NR_003264    | SDHAP1    |
| hsa-miR-15a-5p | NR_003265    | SDHAP2    |
| hsa-miR-194-5p | NM_000862    | HSD3B1    |
| hsa-miR-194-5p | NM_005819    | STX6      |
| hsa-miR-194-5p | NM_001981    | EPS15     |
| hsa-miR-194-5p | NM_001159969 | EPS15     |
| hsa-miR-194-5p | NM_003128    | SPTBN1    |
| hsa-miR-194-5p | NM_001127221 | CACNA1A   |
| hsa-miR-194-5p | NM_012194    | KIAA1549L |
| hsa-miR-194-5p | NM_012090    | MACF1     |
| hsa-miR-194-5p | NM_002758    | MAP2K6    |
| hsa-miR-194-5p | NM_001077203 | SENK7     |
| hsa-miR-194-5p | NM_016376    | ANKFY1    |
| hsa-miR-194-5p | NM_007041    | ATE1      |
| hsa-miR-194-5p | NM_001001976 | ATE1      |

|                |              |           |
|----------------|--------------|-----------|
| hsa-miR-194-5p | NM_015442    | CNOT10    |
| hsa-miR-194-5p | NR_023938    | C14orf132 |
| hsa-miR-194-5p | NM_001002915 | IGFL2     |
| hsa-miR-194-5p | NM_001135113 | IGFL2     |
| hsa-miR-194-5p | NM_022164    | TINAGL1   |
| hsa-miR-194-5p | NM_032840    | SPRYD3    |
| hsa-miR-194-5p | NM_001204414 | TINAGL1   |
| hsa-miR-194-5p | NM_001135748 | NEIL2     |
| hsa-miR-194-5p | NR_029711    | MIR194-1  |
| hsa-miR-194-5p | NM_024814    | CBLL1     |
| hsa-miR-194-5p | NR_024199    | CBLL1     |
| hsa-miR-194-5p | NM_017666    | ZNF280C   |
| hsa-miR-194-5p | NR_002816    | THSD1P1   |

Abbreviation: The gene symbol is presented as in NCBI at <http://www.ncbi.nlm.nih.gov>.

**Supplementary Table S4. GO terms significantly over-represented among the deregulated miRNA targets.**

| Term               | Description                                          | P-value  |
|--------------------|------------------------------------------------------|----------|
| biological process |                                                      |          |
| G0:0051128         | regulation of cellular component organization        | 1.30E-04 |
| G0:0030100         | regulation of endocytosis                            | 1.20E-03 |
| G0:0002755         | MyD88-dependent toll-like receptor signaling pathway | 1.52E-03 |
| G0:0035556         | intracellular signal transduction                    | 2.94E-03 |
| G0:0060627         | regulation of vesicle-mediated transport             | 4.26E-03 |
| G0:0007509         | mesoderm migration involved in gastrulation          | 1.50E-02 |
| G0:0001909         | leukocyte mediated cytotoxicity                      | 1.89E-02 |
| G0:0007399         | nervous system development                           | 2.03E-02 |
| G0:0048583         | regulation of response to stimulus                   | 3.52E-02 |
| G0:0009966         | regulation of signal transduction                    | 3.77E-02 |
| cellular component |                                                      |          |
| G0:0048770         | pigment granule                                      | 4.80E-04 |
| G0:0030135         | coated vesicle                                       | 3.90E-03 |
| G0:0031988         | membrane-bounded vesicle                             | 5.20E-03 |
| G0:0043205         | fibril                                               | 1.84E-02 |
| G0:0030136         | clathrin-coated vesicle                              | 2.08E-02 |
| G0:0031410         | cytoplasmic vesicle                                  | 3.94E-02 |
| G0:0016023         | cytoplasmic membrane-bounded vesicle                 | 4.35E-02 |
| G0:0030424         | axon                                                 | 4.61E-02 |
| molecular function |                                                      |          |
| G0:0004000         | adenosine deaminase activity                         | 1.98E-02 |
| G0:0019239         | deaminase activity                                   | 1.98E-02 |
| G0:0019899         | enzyme binding                                       | 2.79E-02 |



**Supplementary Table S5. KEGG pathway analysis results.**

| Pathway name                            | Hits | P value | Q value | Gene symbol                                                                  |
|-----------------------------------------|------|---------|---------|------------------------------------------------------------------------------|
| Axon guidance                           | 8    | 1.11E-3 | 1.10E-2 | LRRC37B;LRRC37A;LRRC4B;LRRC55;LRRC37A6P;LRRC37A2;KIRREL;STK11IP              |
| Neuroactive ligand-receptor interaction | 9    | 2.87E-3 | 2.36E-2 | LRRC37A;F2RL2;GNRHR2;LOC399744;LRRC37A2;P2RX5-TAX1BP3;HTR4;LOC730668; GRIN2A |
| MAPK signaling pathway                  | 10   | 3.66E-4 | 4.06E-3 | CACNA1A;CACNA1H;DUSP7;DUSP9;DUSP16;PLA2G4E;PRDM16;FGFR4;MAP3K8; MAP3K14      |
| Calcium signaling pathway               | 6    | 1.08E-3 | 1.10E-2 | CACNA1A; CACNA1H;P2RX5-TAX1BP3;HTR4;LOC730668; GRIN2A                        |
| Neurotrophin signaling pathway          | 6    | 1.21E-3 | 1.12E-2 | ZNF274;GAB1;ARHGDI1A;YWHAQ; PIK3R2; IRAK1                                    |
| Apoptosis                               | 6    | 1.52E-3 | 1.33E-2 | CASP6; IRAK1; ATM; MAP3K14; MAPKBP1; PIK3R2                                  |

**Abbreviation:** Hits, number of potential target genes in the pathway. The gene symbol is presented as in NCBI at <http://www.ncbi.nlm.nih.gov>.

**Supplementary Table S6. Mean Cq value of mRNAs in RT-PCR.**

| Samples | GAPDH | IRAK1 | CASP6 | MAPKBP1 | MAP2K6 |
|---------|-------|-------|-------|---------|--------|
| c1      | 16.53 | 20.43 | 21.44 | 21.17   | 23.41  |
| c2      | 17.22 | 21.2  | 22.5  | 21.22   | 23.57  |
| c3      | 16.96 | 19.93 | 21.77 | 21.17   | 24.51  |
| c4      | 16.59 | 20.05 | 21    | 21.45   | 22.27  |
| c5      | 16.32 | 20.81 | 21.57 | 20.09   | 23.92  |
| c6      | 16.29 | 21.06 | 22.79 | 20.51   | 22.65  |
| c7      | 17.44 | 21.12 | 23.5  | 21.56   | 23.49  |
| c8      | 16.96 | 22.04 | 22.56 | 20.88   | 24.05  |
| c9      | 17.31 | 21.19 | 24.05 | 23.01   | 24.58  |
| c10     | 16.72 | 20.83 | 21.88 | 21.49   | 23.58  |
| c11     | 16.66 | 20.04 | 21.69 | 20.43   | 24.02  |
| c12     | 17.21 | 21.58 | 23.09 | 22.11   | 22.29  |
| c13     | 17.51 | 21.97 | 22.69 | 22.69   | 23.59  |
| c14     | 17.22 | 22.54 | 22.81 | 22.75   | 23.72  |
| c15     | 16.48 | 21.12 | 21.47 | 21.62   | 23.29  |
| c16     | 16.54 | 20.69 | 20.84 | 21.11   | 22.18  |
| c17     | 17.33 | 22    | 23.51 | 21.26   | 24.19  |
| c18     | 17.47 | 21.43 | 24    | 22.31   | 23.64  |
| c19     | 16.57 | 22.01 | 23.16 | 21.98   | 23.29  |
| c20     | 16.73 | 21.1  | 23.03 | 21.84   | 22.83  |
| c21     | 16.48 | 20.93 | 21.99 | 20.59   | 21.49  |
| c22     | 17.17 | 21.17 | 23.17 | 21.89   | 24.3   |
| c23     | 17.22 | 23.04 | 22.5  | 21.97   | 21.85  |
| c24     | 16.54 | 21.2  | 21.55 | 21.47   | 22.93  |
| c25     | 16.73 | 21.82 | 21.93 | 20.98   | 24     |
| c26     | 17.37 | 21.02 | 23.57 | 22.36   | 22.49  |
| c27     | 16.81 | 20.72 | 22.77 | 21.72   | 24.04  |
| c28     | 16.76 | 20.42 | 21.21 | 21.74   | 23.4   |
| c29     | 16.64 | 19.72 | 24.04 | 21.07   | 23.38  |
| c30     | 17.27 | 20.45 | 23.17 | 22.38   | 23.59  |
| c31     | 17.19 | 21.34 | 23.23 | 21.72   | 22.65  |
| c32     | 16.52 | 21.01 | 22.1  | 21.71   | 22.92  |
| ep1     | 16.49 | 21.65 | 23.44 | 22.12   | 22.16  |
| ep2     | 17.11 | 22.04 | 24.31 | 22.7    | 22.61  |
| ep3     | 16.72 | 21.61 | 23.93 | 22.61   | 21.12  |
| ep4     | 16.39 | 20.95 | 21.88 | 21.95   | 21.83  |
| ep5     | 16.7  | 21.73 | 22.17 | 22.79   | 21.95  |
| ep6     | 16.82 | 22.37 | 22.9  | 21.47   | 23.3   |
| ep7     | 17.3  | 23.27 | 23.59 | 20.97   | 23.19  |
| ep8     | 17.35 | 23.12 | 24.51 | 23.06   | 23.02  |
| ep9     | 16.56 | 22.13 | 24.04 | 22.06   | 21.21  |
| ep10    | 16.69 | 21.92 | 24.24 | 21.79   | 23.82  |
| ep11    | 17.22 | 22.06 | 21.78 | 21.62   | 23.38  |
| ep12    | 17.4  | 22.22 | 24.5  | 22.74   | 23.5   |
| ep13    | 17.17 | 23    | 21.47 | 23.47   | 23.89  |
| ep14    | 16.62 | 21.61 | 23.55 | 22.58   | 21.2   |
| ep15    | 16.79 | 22.19 | 22.61 | 21.48   | 22.59  |
| ep16    | 17.47 | 21.83 | 22.7  | 23.17   | 22.92  |
| ep17    | 16.53 | 21.4  | 22.83 | 22.67   | 22.68  |
| ep18    | 17.27 | 21.73 | 23.9  | 21.37   | 22     |
| ep19    | 17.21 | 22.48 | 23.69 | 22.83   | 22.56  |

|      |       |       |       |       |       |
|------|-------|-------|-------|-------|-------|
| ep20 | 16.77 | 22.05 | 24.56 | 22.96 | 21.72 |
| ep21 | 16.7  | 21.92 | 24.42 | 22.06 | 23.62 |
| ep22 | 17.26 | 23.58 | 23.86 | 24.61 | 22.54 |
| ep23 | 17.37 | 22.21 | 24.63 | 23.95 | 23.3  |
| ep24 | 16.88 | 22.1  | 24.11 | 23.1  | 21.62 |
| ep25 | 16.79 | 21.79 | 23.44 | 23.26 | 21.61 |
| ep26 | 16.56 | 22.02 | 22.67 | 22.9  | 23.2  |
| ep27 | 16.39 | 21.02 | 21.55 | 21.99 | 21.6  |
| ep28 | 17.33 | 23.37 | 21.79 | 22.69 | 23.26 |
| ep29 | 17.26 | 22.1  | 22.03 | 23.61 | 22.99 |
| ep30 | 16.54 | 22.01 | 21.68 | 21.61 | 21.57 |
| ep31 | 17.03 | 22.52 | 23.57 | 24.04 | 21.63 |
| ep32 | 16.93 | 21.97 | 24.34 | 22.5  | 22.45 |
| ep33 | 17.07 | 22.87 | 24.55 | 23.59 | 22.16 |
| ep34 | 16.36 | 21.58 | 23.82 | 22.42 | 22.34 |
